# Supplementary material for: Mini-sternotomy for aortic valve replacement reduces the length of stay in the cardiac intensive care unit: meta-analysis of randomised controlled trials
Source: PubMed Central journal article supplement — BMJ Open. 2011 Nov 24;1(2):e000266. doi: 10.1136/bmjopen-2011-000266 (PMC3225590; doi:10.1136/bmjopen-2011-000266), 2011-11-24
Supplement: bmjopen-2011-000266.draft_revisions.pdf [file bmjopen-2011-000266.draft_revisions.pdf]

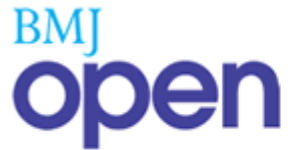

**Mini-sternotomy for Aortic Valve Replacement Reduces the Length of Stay in the Cardiac Intensive Care: A Mini Meta-analysis**

|                                 |                                                            |
|---------------------------------|------------------------------------------------------------|
| Journal:                        | <i>BMJ Open</i>                                            |
| Manuscript ID:                  | bmjopen-2011-000266                                        |
| Article Type:                   | Research                                                   |
| Date Submitted by the Author:   | 21-Jul-2011                                                |
| Complete List of Authors:       | Khoshbin, Espeed; UHSM, Cardiac Surgery                    |
| <b>Primary Subject Heading</b>: | Cardiovascular medicine                                    |
| Keywords:                       | Mini-sternotomy , Aortic Valve Replacement , Meta analysis |
|                                 |                                                            |

SCHOLARONE™  
Manuscripts

Peer Review Only

## Mini-sternotomy for Aortic Valve Replacement Reduces the Length of Stay in the Cardiac Intensive Care: A Mini Meta-analysis.

Khoshbin E, Prayaga S, Kinsella J, Sutherland FWH.

Department of Cardiothoracic Surgeon, Golden Jubilee National Hospital, and Academic Unit of Anaesthesia, Pain and Critical Care, University of Glasgow, Scotland, UK.

### Abstract

**Introduction:** Mini-sternotomy for isolated aortic valve replacement aims to reduce operative trauma hastening recovery and improving the cosmetic outcome of cardiac surgery. The short-term clinical benefits from the mini-sternotomy are presumed to arise because the incision is less extensive and the lower half of the chest cage remains intact. The basic conduct of virtually all other aspects of the aortic valve replacement procedure remains the same. Therefore, similar long term outcomes are to be expected. **Methods:** We conducted a meta-analysis of the only available prospective randomised controlled trials in the published English literature since 1996. Four studies met our criteria: Prospective randomised controlled trials comparing minimally invasive [Inverted 'C' or 'L' (J) shaped] hemi-sternotomy versus conventional sternotomy for adults undergoing isolated aortic valve replacement using standard cardiopulmonary bypass technique. Our outcome measures were the length of positive pressure ventilation, blood loss, intensive care and hospital stay. **Results:** The length of ITU stay was significantly shorter by 0.57 days in favour of the mini-sternotomy group (CI: -0.95, -0.2;  $p = 0.003$ ). There was no advantage in terms of duration of ventilation (CI:-3.48, 0.36;  $p = 0.11$ ). However there was some evidence to suggest a reduction in blood loss and the length of stay in hospital in the mini-sternotomy group. This however did not prove to be statistically significant [154.17mls reduction (CI: -324.51, 16.17;  $p = 0.08$ ) and 2.03 days less (CI:-4.12, 0.05;  $p = 0.06$ ) respectively]. **Conclusion:** Mini-sternotomy for isolated aortic valve replacement significantly reduces the length of stay in cardiac intensive care. Other short term benefits may include a reduction in blood loss or the length of hospital stay.

### Article summary

**Article focus:** This article tests the null hypothesis that, mini-sternotomy has no outcome benefit for aortic surgery. **Key message:** Mini-sternotomy for aortic valve replacement reduces the length of stay in intensive care unit. **Strengths:** Use of highest quality evidence based medicine. **Limitations:** Lack of input from patients.

### Introduction

A mini-sternotomy through an inverted C, L (or J) shaped hemi-sternotomy is a technique that aims to reduce the operative trauma thereby hastening recovery and improving the cosmetic outcome of cardiac surgery. Some may be of the opinion that the latter has the

1  
2  
3 potential to confer the greatest benefit. There have been a number of studies, some claim  
4 benefits of mini-sternotomy and others have been equivocal about postoperative outcomes  
5 such as ventilation requirement, bleeding, and intensive care and hospital stay for isolated  
6 aortic valve replacement. However there are only but a few prospective randomised  
7 controlled trials (PRCT) in this subject <sup>(1-4)</sup>. We conducted a meta-analysis of the available  
8 PRCTs.  
9

## 10 11 **Methods**

12  
13  
14 Electronic search for relevant publications in the English language were conducted in  
15 MEDLINE, EMBASE and CENTRAL databases starting from 1996, including the  
16 keywords 'aortic valve surgery', 'controlled clinical trials' and 'minimally invasive  
17 surgery'. Reference lists of relevant articles were also searched. We only included  
18 prospective randomised controlled trials in our mini-meta-analysis.  
19

20 Of the 21 studies found in our search, 4 studies met our criteria. We selected the studies  
21 according to the following inclusion criteria: 1. The type of studies: Prospective  
22 randomised controlled trials comparing minimally invasive versus conventional  
23 sternotomy, 2. Participants: Adult patients undergoing isolated aortic valve replacement  
24 using standard cardiopulmonary bypass technique. The exclusion criterions were, 1. Any  
25 other type of mini-sternotomy than hemi-sternotomy through inverted 'C' or 'L' (J) shaped  
26 approach. 2. The language of the article was limited to English.  
27

28 Our outcome measures included the length of positive pressure ventilation, blood loss,  
29 intensive care and hospital stay.

30 Statistical analysis was performed using Review Manager (RevMan) version 5.0. As the  
31 data obtained was continuous, combined mean differences were measured using the  
32 Random effects model on the presumption that individual studies had varied outcomes.  
33 Tests for heterogeneity were performed using the chi square test, I<sup>2</sup> test and degrees of  
34 freedom.  
35  
36

## 37 38 **Results**

39  
40 There were two meta-analyses in this subject <sup>(1, 2)</sup>, four of five PRCTs were subjected to our  
41 meta-analysis <sup>(3-6)</sup>. One PRCT was excluded due to lack of data <sup>(7)</sup>. An attempt was made to  
42 contact the corresponding author for additional information with a view to include that  
43 study. This was unsuccessful. Other excluded studies <sup>(8-24)</sup>, were either prospective non-  
44 randomized (n = 5), case control studies (n = 3), retrospective studies (n = 1), different type  
45 of incisions (n = 2) or studies with outcome measures irrelevant to our study (n = 4). The  
46 total number of patients included in this meta-analysis was the sum of the patients recruited  
47 in to the four PRCTs. That equals to 220 patients. Table 1 illustrates each of these studies  
48 characteristics. The following results are presented as mean differences in outcomes  
49 between mini-sternotomy and conventional sternotomy groups in the Random effects  
50 method.  
51  
52  
53

54  
55 **Duration of mechanical ventilation in hours:** There was a statistically insignificant  
56 reduction in the duration of ventilation (Figure 1). This was 1.56 hours less in the mini-  
57 sternotomy group (CI:-3.48, 0.36; *p* = 0.11).  
58  
59  
60

1  
2  
3  
4  
5 **Postoperative blood loss in the first 24 hours:** There was a statistically insignificant  
6 reduction in blood loss of 154.17mls in the mini-sternotomy group compared to the full  
7 sternotomy (CI: -324.51, 16.17;  $p = 0.08$ ). Illustrated by figure 2.  
8

9  
10 **Lengths of Intensive Care Unit (ICU) stay in days:** Combined mean difference of all the  
11 studies showed that the length of ITU stay was significantly shorter by 0.57 days in favour  
12 of mini-sternotomy group (CI: -0.95, -0.2;  $p = 0.003$ ). Figure 3 illustrates this primary  
13 outcome measure.  
14

15  
16 **Lengths of Hospital stay in days:** As illustrated in figure 4, the duration of hospital stay  
17 was shorter by 2.03 days in favour of the mini-sternotomy group however the difference  
18 again failed to reach statistically significant levels (CI:-4.12, 0.05;  $p = 0.06$ ).  
19

## 20 21 Discussion

22  
23 We performed a mini meta-analysis to compare the short term post-operative outcomes in  
24 four published studies, accounted for differences in their findings, and drew a consensus  
25 view on the potential benefits of a mini-sternotomy over a full median sternotomy for a  
26 standard aortic valve replacement. The following outcome measures were assessed:  
27 Duration of ventilation, postoperative blood loss, length of stay in the intensive care unit  
28 and the hospital stay.  
29

30 Using only the best available level of evidence in this meta-analysis we have clearly  
31 illustrated the advantage of the mini-sternotomy approach in reducing the number of days  
32 spent in the intensive care unit ( $p = 0.003$ ) and a lack of advantage in terms of number of  
33 hours ventilated ( $p = 0.11$ ). We have however failed to prove a clear superiority in favour  
34 of mini-sternotomy in terms of reduction in blood loss ( $p = 0.08$ ) or the length of hospital  
35 stay ( $p = 0.06$ ). The difference may be of clinical importance. The reduction in ITU stay by  
36 0.57 days is a more than 50% reduction in the length of stay in ITU for a typical isolated  
37 aortic valve replacement with potential financial advantages.  
38

39 This study is limited as it only includes four PRCTs, with relatively small number of  
40 subjects and outcome variables. Lack of long term data is not exclusive to this meta-  
41 analysis. These limitations can only be addressed by conducting a well designed and  
42 adequately powered PRCT.  
43

44 The total number of patients included in this study was 220. This is a small number  
45 considering isolated aortic valve replacement constitutes a large proportion of our cardiac  
46 surgical work. There were two extensive well conducted meta-analysis comparing mini-  
47 sternotomy versus conventional sternotomy for aortic valve replacement<sup>(1, 2)</sup>. They  
48 improved the power of the study by including several comparative non randomised studies,  
49 hence increasing the number of patients to 4,586 and 4,667 respectively. These studies  
50 looked at a wide variety of non-sternotomy incisions. They excluded studies if more than  
51 50% of reported cases were not a mini-sternotomy, or operations other than isolated aortic  
52 valve replacement. Their combined conclusion was that mini-sternotomy can be performed  
53 safely for aortic valve replacement without increased risk of death or major complications  
54<sup>(1)</sup> but with no clinical benefits<sup>(2)</sup>. In contrast the rational for our study was to focus on  
55  
56  
57  
58  
59  
60

1  
2  
3 mini-sternotomy incisions and the commonest variations thereof which included the  
4 inverted C and L or (J) mini-sternotomies.

5 An additional consideration is that minimally invasive surgery benefits patients because of  
6 the incision. Cosmesis does not appear to be a priority for patients in the western world <sup>(8)</sup>.  
7 A more cosmetic scar may be more of an issue in Asia due to younger patient population <sup>(3)</sup>  
8 (table 1). This was a limitation in this study for which there was insufficient data for  
9 comparisons to be made in this meta-analysis.  
10  
11

## 12 **Conclusion**

13  
14  
15 There is a significant reduction in the length of stay in cardiac intensive care unit and an  
16 overall benefit in short term outcomes from mini-sternotomy for isolated aortic valve  
17 replacement. This meta-analysis would no doubt prove useful when designing a much  
18 needed, larger and adequately powered prospective randomised controlled trial in this  
19 subject.  
20  
21

## 22 **Acknowledgement**

23  
24  
25 We would like to thank the department of biostatistics at Robertson Centre, University of  
26 Glasgow for their help with the statistical methods, the library staff at Glasgow Royal  
27 Infirmary and the audit office staff at the Golden Jubilee National Hospital for their help  
28 with the literature search.  
29  
30

## 31 **Funding**

32  
33  
34 We would also like to thank Mark Woolley from Cardiosolutions for providing funding to  
35 present this work at the International Society of Minimally Invasive Cardiothoracic Surgery  
36 in Washington DC, June 2011.  
37  
38

## 39 **Competing Interest**

40  
41 None  
42

## 43 **Authors' contributions**

44  
45  
46 All authors contributed equally in design, review of the literature analysis and intellectual  
47 discussion of this manuscript. The primary author Dr Espeed Khoshbin presented this work  
48 at the International Society of Minimally Invasive Cardiothoracic Surgery in Washington  
49 DC, June 2011.  
50  
51  
52  
53  
54  
55  
56  
57  
58  
59  
60

## References

1. Brown ML, McKellar SH, Sundt TM, Schaff HV. Ministernotomy versus conventional sternotomy for aortic valve replacement: a systematic review and meta-analysis. *J Thorac Cardiovasc Surg* 2009;137(3):670-679 e5.
2. Murtuza B, Pepper JR, Stanbridge RD, Jones C, Rao C, Darzi A, et al. Minimal access aortic valve replacement: is it worth it? *Ann Thorac Surg* 2008;85(3):1121-31.
3. Moustafa MA, Abdelsamad AA, Zakaria G, Omarah MM. Minimal vs median sternotomy for aortic valve replacement. *Asian Cardiovasc Thorac Ann* 2007;15(6):472-5.
4. Dogan S, Dzemali O, Wimmer-Greinecker G, Derra P, Doss M, Khan MF, et al. Minimally invasive versus conventional aortic valve replacement: a prospective randomized trial. *J Heart Valve Dis* 2003;12(1):76-80.
5. Bonacchi M, Prifti E, Giunti G, Frati G, Sani G. Does ministernotomy improve postoperative outcome in aortic valve operation? A prospective randomized study. *Ann Thorac Surg* 2002;73(2):460-5; discussion 465-6.
6. Aris A, Camara ML, Montiel J, Delgado LJ, Galan J, Litvan H. Ministernotomy versus median sternotomy for aortic valve replacement: a prospective, randomized study. *Ann Thorac Surg* 1999;67(6):1583-7; discussion 1587-8.
7. Machler HE, Bergmann P, Anelli-Monti M, Dacar D, Rehak P, Knez I, et al. Minimally invasive versus conventional aortic valve operations: a prospective study in 120 patients. *Ann Thorac Surg* 1999;67(4):1001-5.
8. Ehrlich W, Skwara W, Klovekorn W, Roth M, Bauer EP. Do patients want minimally invasive aortic valve replacement? *Eur J Cardiothorac Surg* 2000;17(6):714-7.
9. Bakir I, Casselman FP, Wellens F, Jeanmart H, De Geest R, Degrieck I, et al. Minimally invasive versus standard approach aortic valve replacement: a study in 506 patients. *Ann Thorac Surg* 2006;81(5):1599-604.
10. Chang YS, Lin PJ, Chang CH, Chu JJ, Tan PP. "I" ministernotomy for aortic valve replacement. *Ann Thorac Surg* 1999;68(1):40-5.
11. Byrne JG, Aranki SF, Couper GS, Adams DH, Allred EN, Cohn LH. Reoperative aortic valve replacement: partial upper hemisternotomy versus conventional full sternotomy. *J Thorac Cardiovasc Surg* 1999;118(6):991-7.
12. Candaele S, Herijgers P, Demeyere R, Flameng W, Evers G. Chest pain after partial upper versus complete sternotomy for aortic valve surgery. *Acta Cardiol* 2003;58(1):17-21.
13. Christiansen S, Stypmann J, Tjan TD, Wichter T, Van Aken H, Scheld HH, et al. Minimally-invasive versus conventional aortic valve replacement--perioperative course and mid-term results. *Eur J Cardiothorac Surg* 1999;16(6):647-52.
14. De Smet JM, Rondelet B, Jansens JL, Antoine M, De Canniere D, Le Clerc JL. Assessment based on EuroSCORE of ministernotomy for aortic valve replacement. *Asian Cardiovasc Thorac Ann* 2004;12(1):53-7.
15. Corbi P, Rahmati M, Donal E, Lanquetot H, Jayle C, Menu P, et al. Prospective comparison of minimally invasive and standard techniques for aortic valve replacement: initial experience in the first hundred patients. *J Card Surg* 2003;18(2):133-9.



16. Detter C, Deuse T, Boehm DH, Reichenspurner H, Reichart B. Midterm results and quality of life after minimally invasive vs. conventional aortic valve replacement. *Thorac Cardiovasc Surg* 2002;50(6):337-41.
17. Doll N, Borger MA, Hain J, Bucarius J, Walther T, Gummert JF, et al. Minimal access aortic valve replacement: effects on morbidity and resource utilization. *Ann Thorac Surg* 2002;74(4):S1318-22.
18. Farhat F, Lu Z, Lefevre M, Montagna P, Mikaeloff P, Jegaden O. Prospective comparison between total sternotomy and ministernotomy for aortic valve replacement. *J Card Surg* 2003;18(5):396-401; discussion 402-3.
19. Imazeki T, Irie Y. [Aortic valve replacement through a partial sternotomy]. *Kyobu Geka* 2006;59(8 Suppl):650-5.
20. Lee JW, Lee SK, Choo SJ, Song H, Song MG. Routine minimally invasive aortic valve procedures. *Cardiovasc Surg* 2000;8(6):484-90.
21. Leshnowar BG, Trace CS, Boova RS. Port-access-assisted aortic valve replacement: a comparison of minimally invasive and conventional techniques. *Heart Surg Forum* 2006;9(2):E560-4; discussion E564.
22. Liu J, Sidiropoulos A, Konertz W. Minimally invasive aortic valve replacement (AVR) compared to standard AVR. *Eur J Cardiothorac Surg* 1999;16 Suppl 2:S80-3.
23. Masiello P, Coscioni E, Panza A, Triumbari F, Preziosi G, Di Benedetto G. Surgical results of aortic valve replacement via partial upper sternotomy: comparison with median sternotomy. *Cardiovasc Surg* 2002;10(4):333-8.
24. Mihaljevic T, Cohn LH, Unic D, Aranki SF, Couper GS, Byrne JG. One thousand minimally invasive valve operations: early and late results. *Ann Surg* 2004;240(3):529-34; discussion 534.
25. Murtuza B, Pepper JR, Stanbridge RD, Darzi A, Athanasiou T. Does minimal-access aortic valve replacement reduce the incidence of postoperative atrial fibrillation? *Tex Heart Inst J* 2008;35(4):428-38.

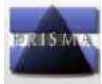

# PRISMA 2009 Checklist

| Section/topic                      | #  | Mini-sternotomy for Aortic Valve Replacement Reduces the Length of Stay in the Cardiac Intensive Care: A Mini Meta-analysis. Khoshbin E, Prayaga S, Kinsella J, Sutherland FWH.                                                                                                                             | Reported on page # |
|------------------------------------|----|-------------------------------------------------------------------------------------------------------------------------------------------------------------------------------------------------------------------------------------------------------------------------------------------------------------|--------------------|
| <b>TITLE</b>                       |    |                                                                                                                                                                                                                                                                                                             |                    |
| Title                              | 1  | Identify the report as a systematic review, meta-analysis, or both.                                                                                                                                                                                                                                         | 1                  |
| <b>ABSTRACT</b>                    |    |                                                                                                                                                                                                                                                                                                             |                    |
| Structured summary                 | 2  | Provide a structured summary including, as applicable: background; objectives; data sources; study eligibility criteria, participants, and interventions; study appraisal and synthesis methods; results; limitations; conclusions and implications of key findings; systematic review registration number. | 1                  |
| <b>INTRODUCTION</b>                |    |                                                                                                                                                                                                                                                                                                             |                    |
| Rationale                          | 3  | Describe the rationale for the review in the context of what is already known.                                                                                                                                                                                                                              | 1                  |
| Objectives                         | 4  | Provide an explicit statement of questions being addressed with reference to participants, interventions, comparisons, outcomes, and study design (PICOS).                                                                                                                                                  | 1&2                |
| <b>METHODS</b>                     |    |                                                                                                                                                                                                                                                                                                             |                    |
| Protocol and registration          | 5  | Indicate if a review protocol exists, if and where it can be accessed (e.g., Web address), and, if available, provide registration information including registration number.                                                                                                                               | 2                  |
| Eligibility criteria               | 6  | Specify study characteristics (e.g., PICOS, length of follow-up) and report characteristics (e.g., years considered, language, publication status) used as criteria for eligibility, giving rationale.                                                                                                      | 2                  |
| Information sources                | 7  | Describe all information sources (e.g., databases with dates of coverage, contact with study authors to identify additional studies) in the search and date last searched.                                                                                                                                  | 2                  |
| Search                             | 8  | Present full electronic search strategy for at least one database, including any limits used, such that it could be repeated.                                                                                                                                                                               | 2                  |
| Study selection                    | 9  | State the process for selecting studies (i.e., screening, eligibility, included in systematic review, and, if applicable, included in the meta-analysis).                                                                                                                                                   | 2                  |
| Data collection process            | 10 | Describe method of data extraction from reports (e.g., piloted forms, independently, in duplicate) and any processes for obtaining and confirming data from investigators.                                                                                                                                  | 2                  |
| Data items                         | 11 | List and define all variables for which data were sought (e.g., PICOS, funding sources) and any assumptions and simplifications made.                                                                                                                                                                       | 2                  |
| Risk of bias in individual studies | 12 | Describe methods used for assessing risk of bias of individual studies (including specification of whether this was done at the study or outcome level), and how this information is to be used in any data synthesis.                                                                                      | 2                  |
| Summary measures                   | 13 | State the principal summary measures (e.g., risk ratio, difference in means).                                                                                                                                                                                                                               | 2                  |
| Synthesis of results               | 14 | Describe the methods of handling data and combining results of studies, if done, including measures of consistency (e.g., $I^2$ ) for each meta-analysis.                                                                                                                                                   | 2                  |



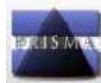

# PRISMA 2009 Checklist

| Section/topic                 | #  | Mini-sternotomy for Aortic Valve Replacement Reduces the Length of Stay in the Cardiac Intensive Care: A Mini Meta-analysis. Khoshbin E, Prayaga S, Kinsella J, Sutherland FWH.                          | Reported on page # |
|-------------------------------|----|----------------------------------------------------------------------------------------------------------------------------------------------------------------------------------------------------------|--------------------|
| Risk of bias across studies   | 15 | Specify any assessment of risk of bias that may affect the cumulative evidence (e.g., publication bias, selective reporting within studies).                                                             | 2                  |
| Additional analyses           | 16 | Describe methods of additional analyses (e.g., sensitivity or subgroup analyses, meta-regression), if done, indicating which were pre-specified.                                                         | 2                  |
| <b>RESULTS</b>                |    |                                                                                                                                                                                                          |                    |
| Study selection               | 17 | Give numbers of studies screened, assessed for eligibility, and included in the review, with reasons for exclusions at each stage, ideally with a flow diagram.                                          | 2-3                |
| Study characteristics         | 18 | For each study, present characteristics for which data were extracted (e.g., study size, PICOS, follow-up period) and provide the citations.                                                             | 2&Table1           |
| Risk of bias within studies   | 19 | Present data on risk of bias of each study and, if available, any outcome level assessment (see item 12).                                                                                                | Figures1-4         |
| Results of individual studies | 20 | For all outcomes considered (benefits or harms), present, for each study: (a) simple summary data for each intervention group (b) effect estimates and confidence intervals, ideally with a forest plot. | Figures1-4         |
| Synthesis of results          | 21 | Present results of each meta-analysis done, including confidence intervals and measures of consistency.                                                                                                  | Figures1-4         |
| Risk of bias across studies   | 22 | Present results of any assessment of risk of bias across studies (see Item 15).                                                                                                                          | Figures1-4         |
| Additional analysis           | 23 | Give results of additional analyses, if done (e.g., sensitivity or subgroup analyses, meta-regression [see Item 16]).                                                                                    | Figures1-4         |
| <b>DISCUSSION</b>             |    |                                                                                                                                                                                                          |                    |
| Summary of evidence           | 24 | Summarize the main findings including the strength of evidence for each main outcome; consider their relevance to key groups (e.g., healthcare providers, users, and policy makers).                     | 3                  |
| Limitations                   | 25 | Discuss limitations at study and outcome level (e.g., risk of bias), and at review-level (e.g., incomplete retrieval of identified research, reporting bias).                                            | 3-4                |
| Conclusions                   | 26 | Provide a general interpretation of the results in the context of other evidence, and implications for future research.                                                                                  | 4                  |
| <b>FUNDING</b>                |    |                                                                                                                                                                                                          |                    |
| Funding                       | 27 | Describe sources of funding for the systematic review and other support (e.g., supply of data); role of funders for the systematic review.                                                               | 4                  |

From: Moher D, Liberati A, Tetzlaff J, Altman DG, The PRISMA Group (2009). Preferred Reporting Items for Systematic Reviews and Meta-Analyses: The PRISMA Statement. PLoS Med 6(6): e1000097. doi:10.1371/journal.pmed1000097

For more information, visit: [www.prisma-statement.org](http://www.prisma-statement.org).

**Figure 1: Duration of ventilation in hours.**

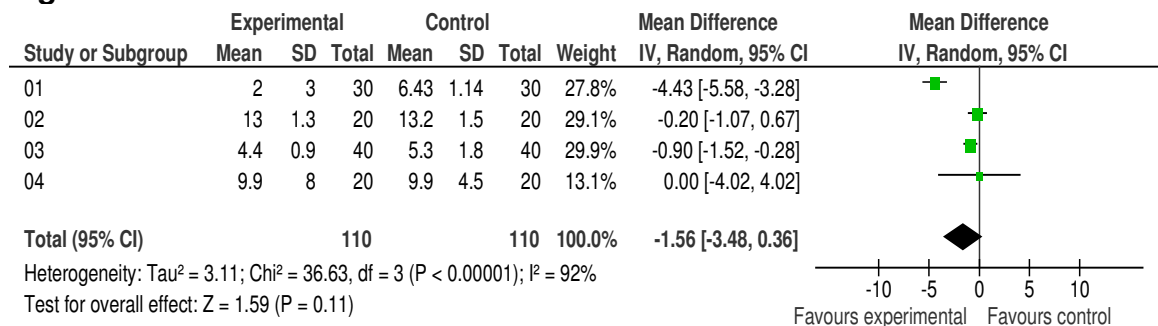

For peer review only

1  
2  
3  
4  
5  
6  
7  
8  
9  
10  
11  
12  
13  
14  
15  
16  
17  
18  
19  
20  
21  
22  
23  
24  
25  
26  
27  
28  
29  
30  
31  
32  
33  
34  
35  
36  
37  
38  
39  
40  
41  
42  
43  
44  
45  
46  
47  
48  
49  
50  
51  
52  
53  
54  
55  
56  
57  
58  
59  
60

**Figure 2: Post operative bleeding in the first 24 hours measured in milliliters.**

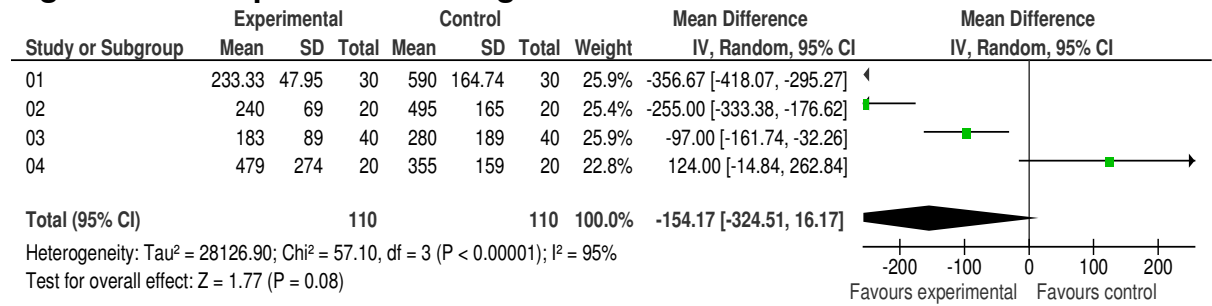

For peer review only

**Figure 3: Length of ITU stay in days.**

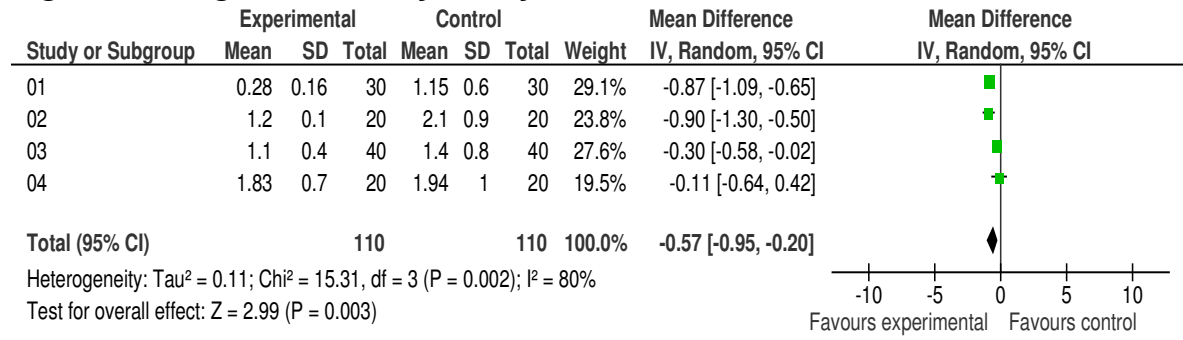

For peer review only

1  
2  
3  
4  
5  
6  
7  
8  
9  
10  
11  
12  
13  
14  
15  
16  
17  
18  
19  
20  
21  
22  
23  
24  
25  
26  
27  
28  
29  
30  
31  
32  
33  
34  
35  
36  
37  
38  
39  
40  
41  
42  
43  
44  
45  
46  
47  
48  
49  
50  
51  
52  
53  
54  
55  
56  
57  
58  
59  
60

**Figure 3: Length of ITU stay in days.**

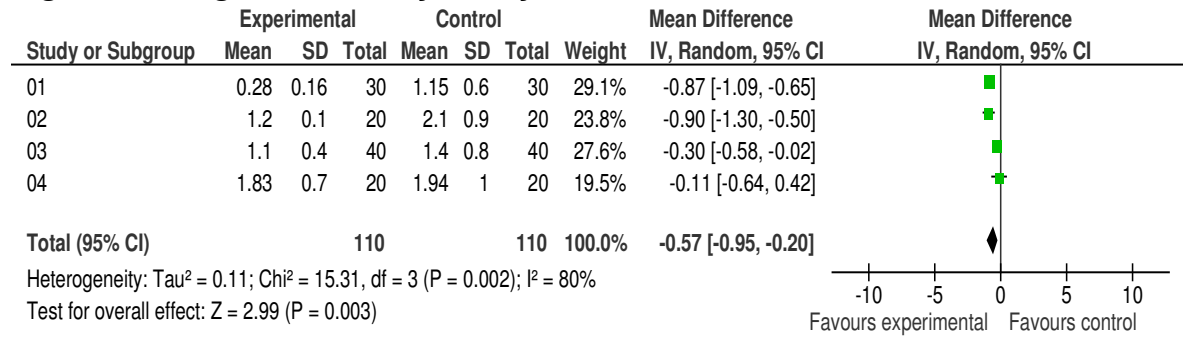

For peer review only

1  
2  
3  
4  
5  
6  
7  
8  
9  
10  
11  
12  
13  
14  
15  
16  
17  
18  
19  
20  
21  
22  
23  
24  
25  
26  
27  
28  
29  
30  
31  
32  
33  
34  
35  
36  
37  
38  
39  
40  
41  
42  
43  
44  
45  
46  
47  
48  
49  
50  
51  
52  
53  
54  
55  
56  
57  
58  
59  
60

Figure 4: Length of hospital stay in days.

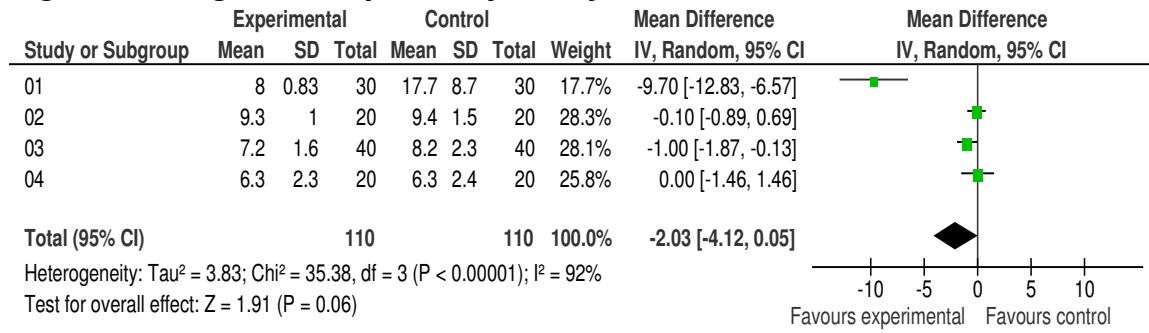

For peer review only



**Table 1 : Study characteristics**

| Study                            | Moustafa et.al.<br>2007                                                                                                                                                                                                     | Dogan et.al.<br>2003                                                                                                                                                                                    | Bonacchi et. al.<br>2002                                                                                                                                                                                                    | Aris et. al.<br>1999                                                                                                                                                                                    |
|----------------------------------|-----------------------------------------------------------------------------------------------------------------------------------------------------------------------------------------------------------------------------|---------------------------------------------------------------------------------------------------------------------------------------------------------------------------------------------------------|-----------------------------------------------------------------------------------------------------------------------------------------------------------------------------------------------------------------------------|---------------------------------------------------------------------------------------------------------------------------------------------------------------------------------------------------------|
| Methods                          | PRCT                                                                                                                                                                                                                        | PRCT                                                                                                                                                                                                    | PRCT                                                                                                                                                                                                                        | PRCT                                                                                                                                                                                                    |
| Number of Participants           | 30 + 30 = 60                                                                                                                                                                                                                | 20 + 20 = 40                                                                                                                                                                                            | 40 + 40 = 80                                                                                                                                                                                                                | 20 + 20 = 40                                                                                                                                                                                            |
| Mean age in years<br>(Full/Mini) | 23.8 / 22.9                                                                                                                                                                                                                 | 64.3 / 65.7                                                                                                                                                                                             | 62.6 / 64.0                                                                                                                                                                                                                 | 62.2 / 66.5                                                                                                                                                                                             |
| Sex M:F (Full/Mini)              | 15:15 / 16:14                                                                                                                                                                                                               | 11:9 / 9:11                                                                                                                                                                                             | -                                                                                                                                                                                                                           | -                                                                                                                                                                                                       |
| Operation                        | Isolated AVR                                                                                                                                                                                                                | Isolated AVR                                                                                                                                                                                            | Isolated AVR                                                                                                                                                                                                                | Isolated AVR                                                                                                                                                                                            |
| Interventions                    | Full sternotomy<br>VS.<br>L shaped Mini-sternotomy<br><br>Pain management with<br>tenoxicam                                                                                                                                 | Complete sternotomy<br>VS.<br>L shaped Mini-sternotomy                                                                                                                                                  | Standard sternotomy<br>VS.<br>C or L shaped Mini-<br>sternotomy                                                                                                                                                             | Median sternotomy<br>VS.<br>C or L shaped Mini-<br>sternotomy<br>Pain management with<br>metamizol                                                                                                      |
| Outcomes                         | Duration of ventilation<br>Post op blood loss<br>Length of ITU stay<br>Pulmonary function<br>Analgesic requirement<br>Length of hospital stay<br>Cross clamp time<br>Bypass time<br>Operation time<br>Survival to discharge | Duration of ventilation<br>Post op blood loss<br>Length of ITU stay<br>Pulmonary function<br>-<br>Length of hospital stay<br>Cross clamp time<br>Bypass time<br>Operation time<br>Survival to discharge | Duration of ventilation<br>Post op blood loss<br>Length of ITU stay<br>Pulmonary function<br>Analgesic requirement<br>Length of hospital stay<br>Cross clamp time<br>Bypass time<br>Operation time<br>Survival to discharge | Duration of ventilation<br>Post op blood loss<br>Length of ITU stay<br>Pulmonary function<br>-<br>Length of Hospital stay<br>Cross clamp time<br>Bypass time<br>Operation time<br>Survival to discharge |

PRCT = Prospective randomized controlled trial, AVR = Aortic valve replacement, VS. = Versus, ITU = Intensive care unit

Peer review only

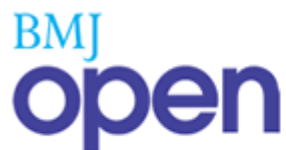

**Mini-sternotomy for Aortic Valve Replacement Reduces the Length of Stay in the Cardiac Intensive Care: A Mini Meta-analysis**

|                                 |                                                                                                                                                                                        |
|---------------------------------|----------------------------------------------------------------------------------------------------------------------------------------------------------------------------------------|
| Journal:                        | <i>BMJ Open</i>                                                                                                                                                                        |
| Manuscript ID:                  | bmjopen-2011-000266.R1                                                                                                                                                                 |
| Article Type:                   | Research                                                                                                                                                                               |
| Date Submitted by the Author:   | 11-Oct-2011                                                                                                                                                                            |
| Complete List of Authors:       | Khoshbin, Espeed; UHSM, Cardiothoracic Surgery Prayaga, Sandhya; GJNH, Anaesthesia Kinsella, John; University of Glasgow, Anaesthesia Sutherland, Fraser; GJNH, Cardiothoracic Surgery |
| <b>Primary Subject Heading</b>: | Cardiovascular medicine                                                                                                                                                                |
| Secondary Subject Heading:      | Cardiovascular medicine                                                                                                                                                                |
| Keywords:                       | Mini-sternotomy , Aortic Valve Replacement , Meta analysis                                                                                                                             |
|                                 |                                                                                                                                                                                        |

SCHOLARONE™  
Manuscripts

## Mini-sternotomy for Aortic Valve Replacement Reduces the Length of Stay in the Cardiac Intensive Care: A Mini Meta-analysis.

Khoshbin E, Prayaga S, Kinsella J, Sutherland FWH.

Department of Cardiothoracic Surgeon, Golden Jubilee National Hospital, and Academic Unit of Anaesthesia, Pain and Critical Care, University of Glasgow, Scotland, UK.

### Abstract

**Introduction:** Mini-sternotomy for isolated aortic valve replacement aims to reduce operative trauma hastening recovery and improving the cosmetic outcome of cardiac surgery. The short-term clinical benefits from the mini-sternotomy are presumed to arise because the incision is less extensive and the lower half of the chest cage remains intact. The basic conduct of virtually all other aspects of the aortic valve replacement procedure remains the same. Therefore, similar long term outcomes are to be expected. **Methods:** We conducted a meta-analysis of the only available prospective randomised controlled trials in the published English literature since 1996. Four studies met our criteria: Prospective randomised controlled trials comparing minimally invasive [Inverted 'C' or 'L' (J) shaped] hemi-sternotomy versus conventional sternotomy for adults undergoing isolated aortic valve replacement using standard cardiopulmonary bypass technique. Our outcome measures were the length of positive pressure ventilation, blood loss, intensive care and hospital stay. **Results:** The length of ITU stay was significantly shorter by 0.57 days in favour of the mini-sternotomy group (CI: -0.95, -0.2;  $p = 0.003$ ). There was no advantage in terms of duration of ventilation (CI:-3.48, 0.36;  $p = 0.11$ ). However there was some evidence to suggest a reduction in blood loss and the length of stay in hospital in the mini-sternotomy group. This however did not prove to be statistically significant [154.17mls reduction (CI: -324.51, 16.17;  $p = 0.08$ ) and 2.03 days less (CI:-4.12, 0.05;  $p = 0.06$ ) respectively]. **Conclusion:** Mini-sternotomy for isolated aortic valve replacement significantly reduces the length of stay in cardiac intensive care. Other short term benefits may include a reduction in blood loss or the length of hospital stay.

### Article summary

**Article focus:** This article tests the null hypothesis that, mini-sternotomy has no outcome benefit for aortic surgery. **Key message:** Mini-sternotomy for aortic valve replacement reduces the length of stay in intensive care unit. **Sample search strategy:** [Medline Embase and Central databases](#). **Strengths:** Use of highest quality evidence based medicine. **Limitations:** [This study is not a "Gold Standard" systematic review in the sense of searching grey literature but a confirmatory study.](#)

## Introduction

A mini-sternotomy through an inverted C, L (or J) shaped hemi-sternotomy is a technique that aims to reduce the operative trauma thereby hastening recovery and improving the cosmetic outcome of cardiac surgery. Some may be of the opinion that the latter has the potential to confer the greatest benefit. There have been numerous studies in this subject, some claim benefits in terms of postoperative outcomes, such as ventilation requirement, bleeding, and intensive care and hospital stay for isolated aortic valve replacement performed in this way, others have been equivocal. The two larger meta-analyses in the published literature<sup>(1-2)</sup>, included data from a spectrum of sources ranging from prospective randomised controlled trials (PRCT) to non randomised studies. They addressed important broad questions of safety and efficacy<sup>(1)</sup> and mortality and morbidity<sup>(2)</sup> associated with this method. However failed to show any specific advantages in terms of length of positive pressure ventilation, blood loss, intensive care and hospital stay. We believe these outcomes are best assessed by way of PRCTs, and hence conducted a mini meta-analysis to address these specific questions using only the available PRCTs<sup>(3-6)</sup> published in this subject.

## Methods

Electronic search for relevant publications in the English language were conducted in MEDLINE, EMBASE and CENTRAL databases starting from 1996, **when the first study of minimal invasive AVR was conducted**. We searched for the keywords 'aortic valve surgery', 'controlled clinical trials' and 'minimally invasive surgery'. Reference lists of relevant articles were also searched. We only included prospective randomised controlled trials in our mini-meta-analysis.

Of the 21 studies found in our search, 4 studies met our criteria. We selected the studies according to the following inclusion criteria: 1. The type of studies: Prospective randomised controlled trials comparing minimally invasive versus conventional sternotomy, 2. Participants: Adult patients undergoing isolated aortic valve replacement using standard cardiopulmonary bypass technique. The exclusion criterions were, 1. Any other type of mini-sternotomy than hemi-sternotomy through inverted 'C' or 'L' (J) shaped approach. 2. The language of the article was limited to English (Table 1).

Our outcome measures included the length of positive pressure ventilation, blood loss, intensive care and hospital stay.

Statistical analysis was performed using Review Manager (RevMan) version 5.0. As the data obtained was continuous, combined mean differences were measured using the Random effects model on the presumption that individual studies had varied outcomes. Tests for heterogeneity were performed using the chi square test, I<sup>2</sup> test and degrees of freedom.

## Results

There were two meta-analyses in this subject<sup>(1,2)</sup>, four of five PRCTs were subjected to our meta-analysis<sup>(3-6)</sup>. One PRCT was excluded due to lack of data<sup>(7)</sup>. An attempt was made to contact the corresponding author for additional information with a view to include that

1  
2  
3 study. This was unsuccessful. Other excluded studies<sup>(8-24)</sup>, were either prospective non-  
4 randomized (n = 5), case control studies (n = 3), retrospective studies (n = 1), different type  
5 of incisions (n = 2) or studies with outcome measures irrelevant to our study (n = 4). The  
6 total number of patients included in this meta-analysis was the sum of the patients recruited  
7 in to the four PRCTs. That equals to 220 patients. Table 2 illustrates each of these studies  
8 characteristics. The following results are presented as mean differences in outcomes  
9 between mini-sternotomy and conventional sternotomy groups in the Random effects  
10 method.  
11  
12

13  
14 **Duration of mechanical ventilation in hours:** There was a statistically insignificant  
15 reduction in the duration of ventilation (Figure 1). This was 1.56 hours less in the mini-  
16 sternotomy group (CI:-3.48, 0.36;  $p = 0.11$ ).  
17

18  
19 **Postoperative blood loss in the first 24 hours:** There was a statistically insignificant  
20 reduction in blood loss of 154.17mls in the mini-sternotomy group compared to the full  
21 sternotomy (CI: -324.51, 16.17;  $p = 0.08$ ). Illustrated by figure 2.  
22  
23

24 **Lengths of Intensive Care Unit (ICU) stay in days:** Combined mean difference of all the  
25 studies showed that the length of ITU stay was significantly shorter by 0.57 days in favour  
26 of mini-sternotomy group (CI: -0.95, -0.2;  $p = 0.003$ ). Figure 3 illustrates this primary  
27 outcome measure.  
28  
29

30 **Lengths of Hospital stay in days:** As illustrated in figure 4, the duration of hospital stay  
31 was shorter by 2.03 days in favour of the mini-sternotomy group however the difference  
32 again failed to reach statistically significant levels (CI:-4.12, 0.05;  $p = 0.06$ ).  
33  
34

## 35 Discussion

36  
37 We performed a mini meta-analysis to compare the short term post-operative outcomes in  
38 four published studies, accounted for differences in their findings, and drew a consensus  
39 view on the potential benefits of a mini-sternotomy over a full median sternotomy for a  
40 standard aortic valve replacement. The following outcome measures were assessed:  
41 Duration of ventilation, postoperative blood loss, length of stay in the intensive care unit  
42 and the hospital stay.  
43

44 Using only the best available level of evidence in this meta-analysis we have clearly  
45 illustrated the advantage of the mini-sternotomy approach in reducing the number of days  
46 spent in the intensive care unit ( $p = 0.003$ ) and a lack of advantage in terms of number of  
47 hours ventilated ( $p = 0.11$ ). We have however failed to prove a clear superiority in favour  
48 of mini-sternotomy in terms of reduction in blood loss ( $p = 0.08$ ) or the length of hospital  
49 stay ( $p = 0.06$ ). **However this shows a trend of significance.** None of the previous meta-  
50 analyses showed such trend. Our meta-analysis therefore highlights a much needed, larger  
51 and adequately powered prospective randomised controlled trial for these specific  
52 outcomes. The reduction in ITU stay by 0.57 days is a more than 50% reduction in the  
53 length of stay in ITU for a typical isolated aortic valve replacement with potential financial  
54 advantages.  
55  
56  
57  
58  
59  
60

1  
2  
3 This study is limited as it is not a “Gold Standard” systematic review in the sense of  
4 searching grey literature but a confirmatory study. It only includes four PRCTs, with a  
5 relatively small number of subjects and outcome variables. A fifth PRCT by Macheler et,  
6 al. was excluded due to the lack of data regarding ITU and length of hospital stay, however  
7 it should be noted that this trial supported our findings regarding the duration of ventilation  
8 and blood drainage per 24 hours. It should also be mentioned that in the meta-analysis by  
9 Morgan et, al.<sup>(1)</sup> three out of four of the above studies were analyzed separately as a sub  
10 group<sup>(4-6)</sup>. They found a non statistical advantage in terms of ventilation time, bleeding and  
11 ITU stay. In contrast this mini meta-analysis excludes the PRCT by Macheler et, al. but  
12 includes the most recent PRCT by Moustafa et, al.<sup>(3)</sup>. Lack of long term data is not  
13 exclusive to this meta-analysis.  
14

15  
16 The total number of patients included in this study was 220. This is a small number  
17 considering isolated aortic valve replacement constitutes a large proportion of our cardiac  
18 surgical work. There were two extensive well conducted meta-analysis comparing mini-  
19 sternotomy versus conventional sternotomy for aortic valve replacement<sup>(1, 2)</sup>. They  
20 improved the power of the study by including several comparative non randomised studies,  
21 hence increasing the number of patients to 4,586 and 4,667 respectively. These studies  
22 looked at a wide variety of non-sternotomy incisions. They excluded studies if more than  
23 50% of reported cases were not a mini-sternotomy, or operations other than isolated aortic  
24 valve replacement. Their combined conclusion was that mini-sternotomy can be performed  
25 safely for aortic valve replacement without increased risk of death or major complications  
26<sup>(1)</sup> but with no clinical benefits<sup>(2)</sup>. In contrast the rationale for our study was to focus on  
27 mini-sternotomy incisions and the commonest variations thereof which included the  
28 inverted C and L or (J) mini-sternotomies.  
29

30 There also exists a degree of geographical variation which should be taken in to  
31 consideration. For example: the benefits due to the incision. Cosmesis does not appear to  
32 be a priority for patients in the western world<sup>(8)</sup>. A more cosmetic scar may be more of an  
33 issue in Asia due to younger patient population<sup>(3)</sup> (table 2). This was a limitation in this  
34 study for which there was insufficient data for comparisons to be made. However  
35 minimally invasive valve surgery is already known to improve patient satisfaction while  
36 reducing costs of cardiac valve replacement<sup>(25-26)</sup>.  
37  
38  
39  
40

## 41 Conclusion

42  
43 There is a significant reduction in the length of stay in cardiac intensive care unit and an  
44 overall benefit in short term outcomes from mini-sternotomy for isolated aortic valve  
45 replacement. This meta-analysis would no doubt prove useful when designing a much  
46 needed, larger and adequately powered prospective randomised controlled trial in this  
47 subject.  
48  
49

## 50 Acknowledgement

51  
52 We would like to thank the department of biostatistics at Robertson Centre, University of  
53 Glasgow for their help with the statistical methods, the library staff at Glasgow Royal  
54 Infirmary and the audit office staff at the Golden Jubilee National Hospital for their help  
55 with the literature search.  
56  
57  
58  
59  
60



**Funding**

We would also like to thank Mark Woolley from Cardiosolutions for providing funding to present this work at the International Society of Minimally Invasive Cardiothoracic Surgery in Washington DC, June 2011.

**Competing Interest**

None

**Authors' contributions**

All authors contributed equally in design, review of the literature analysis and intellectual discussion of this manuscript. The primary author Dr Espeed Khoshbin presented this work at the International Society of Minimally Invasive Cardiothoracic Surgery in Washington DC, June 2011.

peer review only

## References

1. Brown ML, McKellar SH, Sundt TM, et al. Ministernotomy versus conventional sternotomy for aortic valve replacement: a systematic review and meta-analysis. *J Thorac Cardiovasc Surg* 2009;137:670-679 e5.
2. Murtuza B, Pepper JR, Stanbridge RD, et al. Minimal access aortic valve replacement: is it worth it? *Ann Thorac Surg* 2008;85:1121-31.
3. Moustafa MA, Abdelsamad AA, Zakaria G, et al. Minimal vs median sternotomy for aortic valve replacement. *Asian Cardiovasc Thorac Ann* 2007;15:472-5.
4. Dogan S, Dzemali O, Wimmer-Greinecker G, et al. Minimally invasive versus conventional aortic valve replacement: a prospective randomized trial. *J Heart Valve Dis* 2003;12:76-80.
5. Bonacchi M, Prifti E, Giunti G, et al. Does ministernotomy improve postoperative outcome in aortic valve operation? A prospective randomized study. *Ann Thorac Surg* 2002;73:460-5; discussion 465-6.
6. Aris A, Camara ML, Montiel J, et al. Ministernotomy versus median sternotomy for aortic valve replacement: a prospective, randomized study. *Ann Thorac Surg* 1999;67:1583-7; discussion 1587-8.
7. Machler HE, Bergmann P, Anelli-Monti M, et al. Minimally invasive versus conventional aortic valve operations: a prospective study in 120 patients. *Ann Thorac Surg* 1999;67:1001-5.
8. Ehrlich W, Skwara W, Klovekorn W, et al. Do patients want minimally invasive aortic valve replacement? *Eur J Cardiothorac Surg* 2000;17:714-7.
9. Bakir I, Casselman FP, Wellens F, et al. Minimally invasive versus standard approach aortic valve replacement: a study in 506 patients. *Ann Thorac Surg* 2006;81:1599-604.
10. Chang YS, Lin PJ, Chang CH, et al. "I" ministernotomy for aortic valve replacement. *Ann Thorac Surg* 1999;68:40-5.
11. Byrne JG, Aranki SF, Couper GS, et al. Reoperative aortic valve replacement: partial upper hemisternotomy versus conventional full sternotomy. *J Thorac Cardiovasc Surg* 1999;118:991-7.
12. Candaele S, Herijgers P, Demeyere R, et al. Chest pain after partial upper versus complete sternotomy for aortic valve surgery. *Acta Cardiol* 2003;58:17-21.
13. Christiansen S, Stypmann J, Tjan TD, et al. Minimally-invasive versus conventional aortic valve replacement--perioperative course and mid-term results. *Eur J Cardiothorac Surg* 1999;16:647-52.
14. De Smet JM, Rondelet B, Jansens JL, et al. Assessment based on EuroSCORE of ministernotomy for aortic valve replacement. *Asian Cardiovasc Thorac Ann* 2004;12:53-7.
15. Corbi P, Rahmati M, Donal E, et al. Prospective comparison of minimally invasive and standard techniques for aortic valve replacement: initial experience in the first hundred patients. *J Card Surg* 2003;18:133-9.
16. Detter C, Deuse T, Boehm DH, et al. Midterm results and quality of life after minimally invasive vs. conventional aortic valve replacement. *Thorac Cardiovasc Surg* 2002;50:337-41.

17. Doll N, Borger MA, Hain J, et al. Minimal access aortic valve replacement: effects on morbidity and resource utilization. *Ann Thorac Surg* 2002;74:S1318-22.
18. Farhat F, Lu Z, Lefevre M, et al. Prospective comparison between total sternotomy and ministernotomy for aortic valve replacement. *J Card Surg* 2003;18:396-401; discussion 402-3.
19. Imazeki T, Irie Y. [Aortic valve replacement through a partial sternotomy]. *Kyobu Geka* 2006;59:650-5.
20. Lee JW, Lee SK, Choo SJ, et al. Routine minimally invasive aortic valve procedures. *Cardiovasc Surg* 2000;8:484-90.
21. Leshnower BG, Trace CS, Boova RS. Port-access-assisted aortic valve replacement: a comparison of minimally invasive and conventional techniques. *Heart Surg Forum* 2006;9:E560-4; discussion E564.
22. Liu J, Sidiropoulos A, Konertz W. Minimally invasive aortic valve replacement (AVR) compared to standard AVR. *Eur J Cardiothorac Surg* 1999;16 Suppl 2:S80-3.
23. Masiello P, Coscioni E, Panza A, et al. Surgical results of aortic valve replacement via partial upper sternotomy: comparison with median sternotomy. *Cardiovasc Surg* 2002;10:333-8.
24. Mihaljevic T, Cohn LH, Unic D, et al. One thousand minimally invasive valve operations: early and late results. *Ann Surg* 2004;240:529-34; discussion 534.
25. Cohn LH, Adams DH, Couper GS, et al. Minimally invasive cardiac valve surgery improves patient satisfaction whole reducing costs of cardiac valve replacement and repair. *Ann Surg* 1997;226:421-428.
26. Cosgrove DM, Sabik JF. Minimally invasive approach for aortic valve operations. *Ann Thorac Surg* 1996;62:596-597.

Table 1: Consort diagram

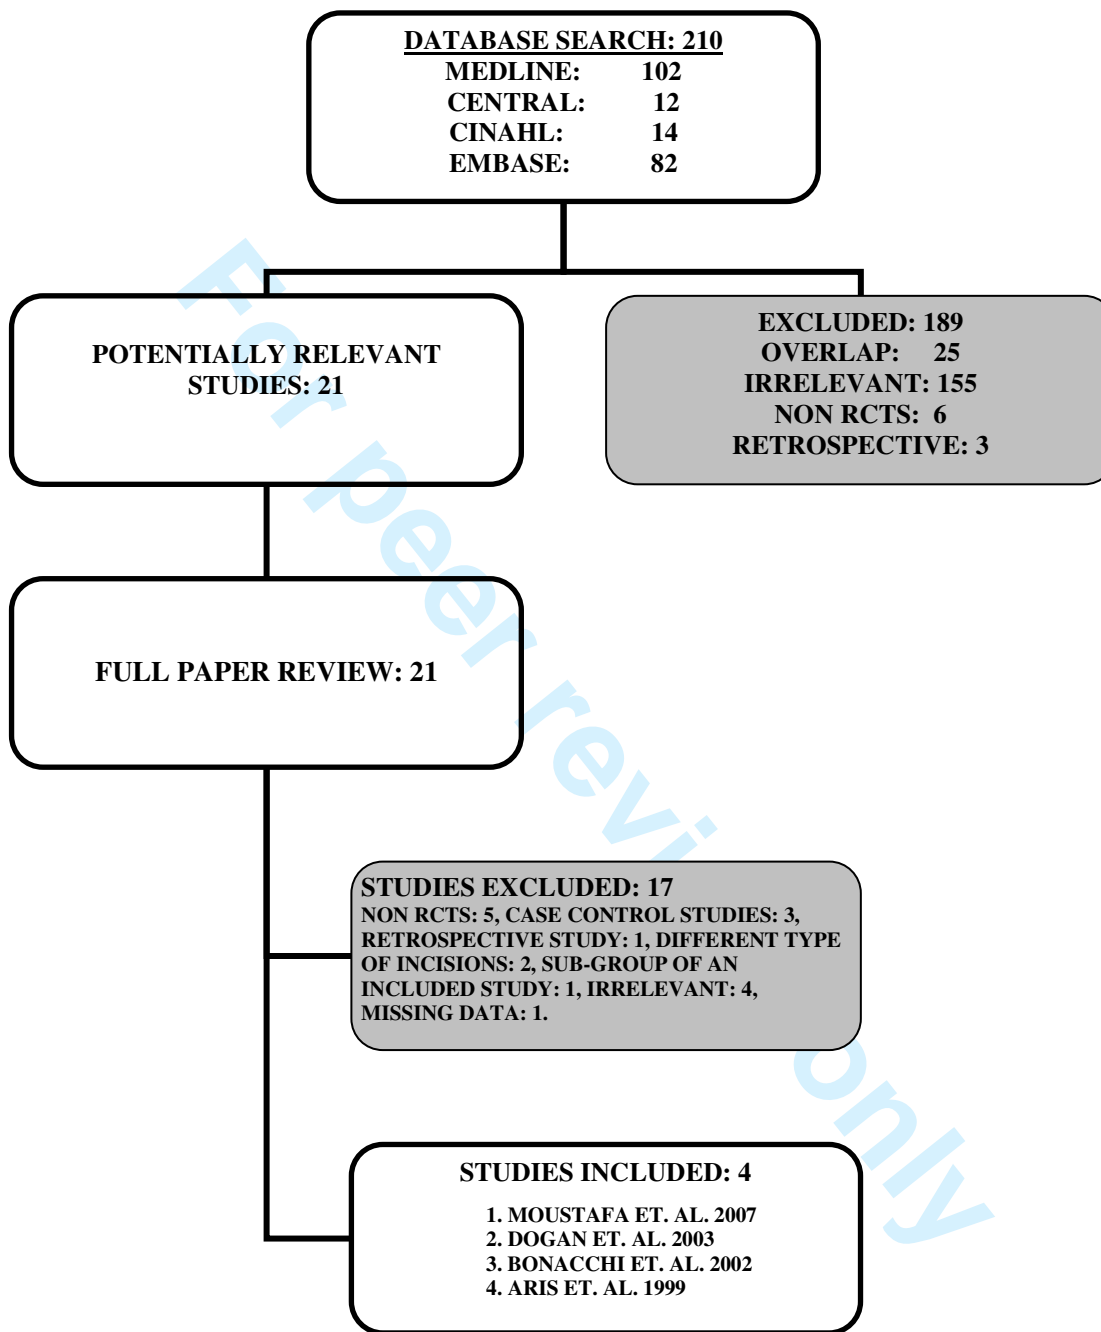

**Table 2 : Study characteristics**

| Study                            | Moustafa et.al.<br>2007                                                                                                                                                                                                     | Dogan et.al.<br>2003                                                                                                                                                                                    | Bonacchi et. al.<br>2002                                                                                                                                                                                                    | Aris et. al.<br>1999                                                                                                                                                                                    |
|----------------------------------|-----------------------------------------------------------------------------------------------------------------------------------------------------------------------------------------------------------------------------|---------------------------------------------------------------------------------------------------------------------------------------------------------------------------------------------------------|-----------------------------------------------------------------------------------------------------------------------------------------------------------------------------------------------------------------------------|---------------------------------------------------------------------------------------------------------------------------------------------------------------------------------------------------------|
| Methods                          | PRCT                                                                                                                                                                                                                        | PRCT                                                                                                                                                                                                    | PRCT                                                                                                                                                                                                                        | PRCT                                                                                                                                                                                                    |
| Number of Participants           | 30 + 30 = 60                                                                                                                                                                                                                | 20 + 20 = 40                                                                                                                                                                                            | 40 + 40 = 80                                                                                                                                                                                                                | 20 + 20 = 40                                                                                                                                                                                            |
| Mean age in years<br>(Full/Mini) | 23.8 / 22.9                                                                                                                                                                                                                 | 64.3 / 65.7                                                                                                                                                                                             | 62.6 / 64.0                                                                                                                                                                                                                 | 62.2 / 66.5                                                                                                                                                                                             |
| Sex M:F (Full/Mini)              | 15:15 / 16:14                                                                                                                                                                                                               | 11:9 / 9:11                                                                                                                                                                                             | -                                                                                                                                                                                                                           | -                                                                                                                                                                                                       |
| Operation                        | Isolated AVR                                                                                                                                                                                                                | Isolated AVR                                                                                                                                                                                            | Isolated AVR                                                                                                                                                                                                                | Isolated AVR                                                                                                                                                                                            |
| Interventions                    | Full sternotomy<br>VS.<br>L shaped Mini-sternotomy<br><br>Pain management with<br>tenoxicam                                                                                                                                 | Complete sternotomy<br>VS.<br>L shaped Mini-sternotomy                                                                                                                                                  | Standard sternotomy<br>VS.<br>C or L shaped Mini-<br>sternotomy                                                                                                                                                             | Median sternotomy<br>VS.<br>C or L shaped Mini-<br>sternotomy<br>Pain management with<br>metamizol                                                                                                      |
| Outcomes                         | Duration of ventilation<br>Post op blood loss<br>Length of ITU stay<br>Pulmonary function<br>Analgesic requirement<br>Length of hospital stay<br>Cross clamp time<br>Bypass time<br>Operation time<br>Survival to discharge | Duration of ventilation<br>Post op blood loss<br>Length of ITU stay<br>Pulmonary function<br>-<br>Length of hospital stay<br>Cross clamp time<br>Bypass time<br>Operation time<br>Survival to discharge | Duration of ventilation<br>Post op blood loss<br>Length of ITU stay<br>Pulmonary function<br>Analgesic requirement<br>Length of hospital stay<br>Cross clamp time<br>Bypass time<br>Operation time<br>Survival to discharge | Duration of ventilation<br>Post op blood loss<br>Length of ITU stay<br>Pulmonary function<br>-<br>Length of Hospital stay<br>Cross clamp time<br>Bypass time<br>Operation time<br>Survival to discharge |

PRCT = Prospective randomized controlled trial, AVR = Aortic valve replacement, VS. = Versus, ITU = Intensive care unit

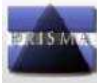

# PRISMA 2009 Checklist

| Section/topic                      | #  | Mini-sternotomy for Aortic Valve Replacement Reduces the Length of Stay in the Cardiac Intensive Care: A Mini Meta-analysis. Khoshbin E, Prayaga S, Kinsella J, Sutherland FWH.                                                                                                                             | Reported on page # |
|------------------------------------|----|-------------------------------------------------------------------------------------------------------------------------------------------------------------------------------------------------------------------------------------------------------------------------------------------------------------|--------------------|
| <b>TITLE</b>                       |    |                                                                                                                                                                                                                                                                                                             |                    |
| Title                              | 1  | Identify the report as a systematic review, meta-analysis, or both.                                                                                                                                                                                                                                         | 1                  |
| <b>ABSTRACT</b>                    |    |                                                                                                                                                                                                                                                                                                             |                    |
| Structured summary                 | 2  | Provide a structured summary including, as applicable: background; objectives; data sources; study eligibility criteria, participants, and interventions; study appraisal and synthesis methods; results; limitations; conclusions and implications of key findings; systematic review registration number. | 1                  |
| <b>INTRODUCTION</b>                |    |                                                                                                                                                                                                                                                                                                             |                    |
| Rationale                          | 3  | Describe the rationale for the review in the context of what is already known.                                                                                                                                                                                                                              | 1                  |
| Objectives                         | 4  | Provide an explicit statement of questions being addressed with reference to participants, interventions, comparisons, outcomes, and study design (PICOS).                                                                                                                                                  | 1&2                |
| <b>METHODS</b>                     |    |                                                                                                                                                                                                                                                                                                             |                    |
| Protocol and registration          | 5  | Indicate if a review protocol exists, if and where it can be accessed (e.g., Web address), and, if available, provide registration information including registration number.                                                                                                                               | 2                  |
| Eligibility criteria               | 6  | Specify study characteristics (e.g., PICOS, length of follow-up) and report characteristics (e.g., years considered, language, publication status) used as criteria for eligibility, giving rationale.                                                                                                      | 2                  |
| Information sources                | 7  | Describe all information sources (e.g., databases with dates of coverage, contact with study authors to identify additional studies) in the search and date last searched.                                                                                                                                  | 2                  |
| Search                             | 8  | Present full electronic search strategy for at least one database, including any limits used, such that it could be repeated.                                                                                                                                                                               | 2                  |
| Study selection                    | 9  | State the process for selecting studies (i.e., screening, eligibility, included in systematic review, and, if applicable, included in the meta-analysis).                                                                                                                                                   | 2                  |
| Data collection process            | 10 | Describe method of data extraction from reports (e.g., piloted forms, independently, in duplicate) and any processes for obtaining and confirming data from investigators.                                                                                                                                  | 2                  |
| Data items                         | 11 | List and define all variables for which data were sought (e.g., PICOS, funding sources) and any assumptions and simplifications made.                                                                                                                                                                       | 2                  |
| Risk of bias in individual studies | 12 | Describe methods used for assessing risk of bias of individual studies (including specification of whether this was done at the study or outcome level), and how this information is to be used in any data synthesis.                                                                                      | 2                  |
| Summary measures                   | 13 | State the principal summary measures (e.g., risk ratio, difference in means).                                                                                                                                                                                                                               | 2                  |
| Synthesis of results               | 14 | Describe the methods of handling data and combining results of studies, if done, including measures of consistency (e.g., $I^2$ ) for each meta-analysis.                                                                                                                                                   | 2                  |



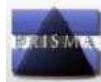

# PRISMA 2009 Checklist

| Section/topic                 | #  | Mini-sternotomy for Aortic Valve Replacement Reduces the Length of Stay in the Cardiac Intensive Care: A Mini Meta-analysis. Khoshbin E, Prayaga S, Kinsella J, Sutherland FWH.                          | Reported on page # |
|-------------------------------|----|----------------------------------------------------------------------------------------------------------------------------------------------------------------------------------------------------------|--------------------|
| Risk of bias across studies   | 15 | Specify any assessment of risk of bias that may affect the cumulative evidence (e.g., publication bias, selective reporting within studies).                                                             | 2                  |
| Additional analyses           | 16 | Describe methods of additional analyses (e.g., sensitivity or subgroup analyses, meta-regression), if done, indicating which were pre-specified.                                                         | 2                  |
| <b>RESULTS</b>                |    |                                                                                                                                                                                                          |                    |
| Study selection               | 17 | Give numbers of studies screened, assessed for eligibility, and included in the review, with reasons for exclusions at each stage, ideally with a flow diagram.                                          | 2-3                |
| Study characteristics         | 18 | For each study, present characteristics for which data were extracted (e.g., study size, PICOS, follow-up period) and provide the citations.                                                             | 2&Table1           |
| Risk of bias within studies   | 19 | Present data on risk of bias of each study and, if available, any outcome level assessment (see item 12).                                                                                                | Figures1-4         |
| Results of individual studies | 20 | For all outcomes considered (benefits or harms), present, for each study: (a) simple summary data for each intervention group (b) effect estimates and confidence intervals, ideally with a forest plot. | Figures1-4         |
| Synthesis of results          | 21 | Present results of each meta-analysis done, including confidence intervals and measures of consistency.                                                                                                  | Figures1-4         |
| Risk of bias across studies   | 22 | Present results of any assessment of risk of bias across studies (see Item 15).                                                                                                                          | Figures1-4         |
| Additional analysis           | 23 | Give results of additional analyses, if done (e.g., sensitivity or subgroup analyses, meta-regression [see Item 16]).                                                                                    | Figures1-4         |
| <b>DISCUSSION</b>             |    |                                                                                                                                                                                                          |                    |
| Summary of evidence           | 24 | Summarize the main findings including the strength of evidence for each main outcome; consider their relevance to key groups (e.g., healthcare providers, users, and policy makers).                     | 3                  |
| Limitations                   | 25 | Discuss limitations at study and outcome level (e.g., risk of bias), and at review-level (e.g., incomplete retrieval of identified research, reporting bias).                                            | 3-4                |
| Conclusions                   | 26 | Provide a general interpretation of the results in the context of other evidence, and implications for future research.                                                                                  | 4                  |
| <b>FUNDING</b>                |    |                                                                                                                                                                                                          |                    |
| Funding                       | 27 | Describe sources of funding for the systematic review and other support (e.g., supply of data); role of funders for the systematic review.                                                               | 4                  |

From: Moher D, Liberati A, Tetzlaff J, Altman DG, The PRISMA Group (2009). Preferred Reporting Items for Systematic Reviews and Meta-Analyses: The PRISMA Statement. PLoS Med 6(6): e1000097. doi:10.1371/journal.pmed1000097

For more information, visit: [www.prisma-statement.org](http://www.prisma-statement.org).

**Figure 1: Duration of ventilation in hours.**

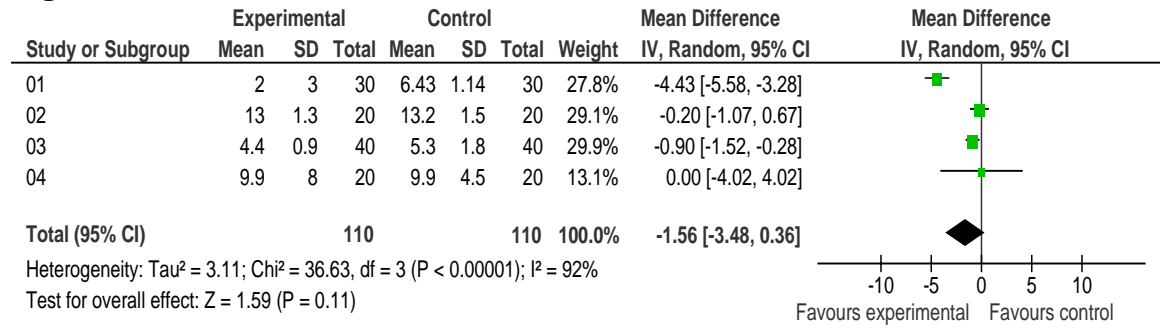

For peer review only

1  
2  
3  
4  
5  
6  
7  
8  
9  
10  
11  
12  
13  
14  
15  
16  
17  
18  
19  
20  
21  
22  
23  
24  
25  
26  
27  
28  
29  
30  
31  
32  
33  
34  
35  
36  
37  
38  
39  
40  
41  
42  
43  
44  
45  
46  
47  
48  
49  
50  
51  
52  
53  
54  
55  
56  
57  
58  
59  
60

**Figure 2: Post operative bleeding in the first 24 hours measured in milliliters.**

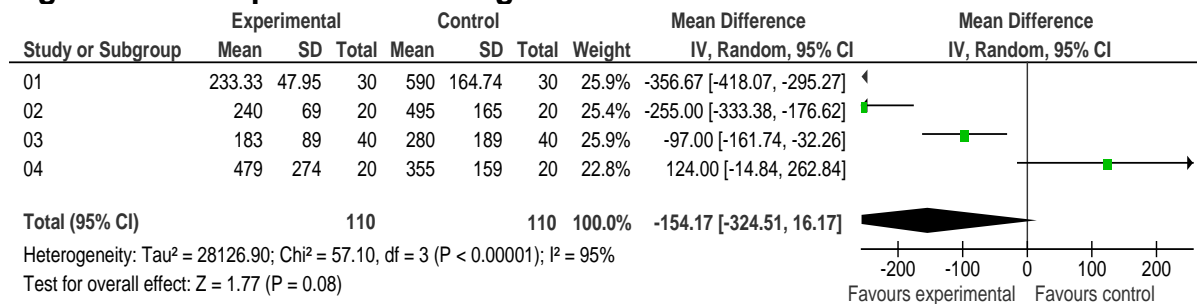

For peer review only

1  
2  
3  
4  
5  
6  
7  
8  
9  
10  
11  
12  
13  
14  
15  
16  
17  
18  
19  
20  
21  
22  
23  
24  
25  
26  
27  
28  
29  
30  
31  
32  
33  
34  
35  
36  
37  
38  
39  
40  
41  
42  
43  
44  
45  
46  
47  
48  
49  
50  
51  
52  
53  
54  
55  
56  
57  
58  
59  
60

**Figure 3: Length of ITU stay in days.**

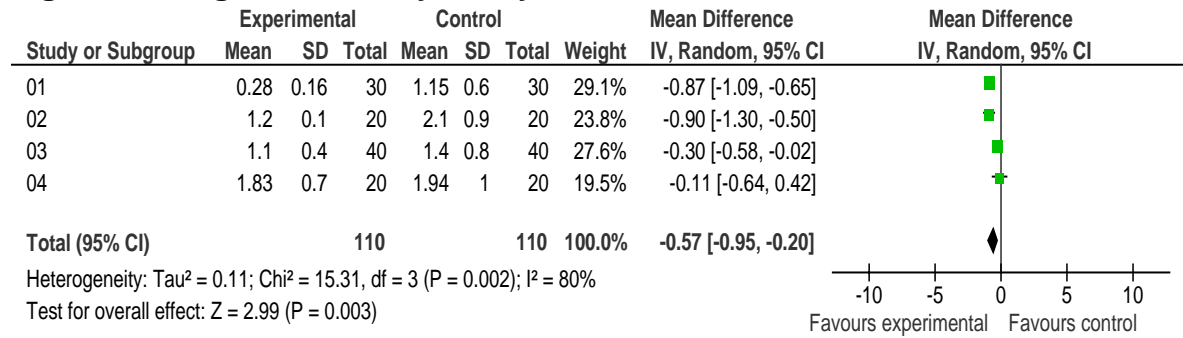

For peer review only

1  
2  
3  
4  
5  
6  
7  
8  
9  
10  
11  
12  
13  
14  
15  
16  
17  
18  
19  
20  
21  
22  
23  
24  
25  
26  
27  
28  
29  
30  
31  
32  
33  
34  
35  
36  
37  
38  
39  
40  
41  
42  
43  
44  
45  
46  
47  
48  
49  
50  
51  
52  
53  
54  
55  
56  
57  
58  
59  
60

Figure 4: Length of hospital stay in days.

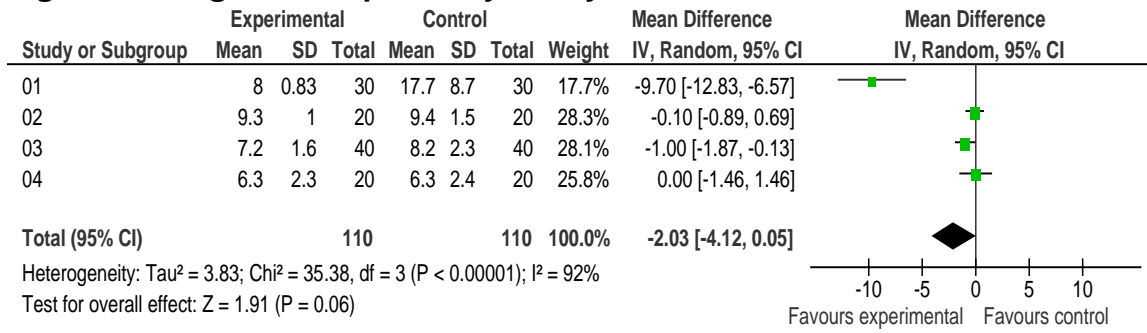

For peer review only

Table 1: Consort diagram

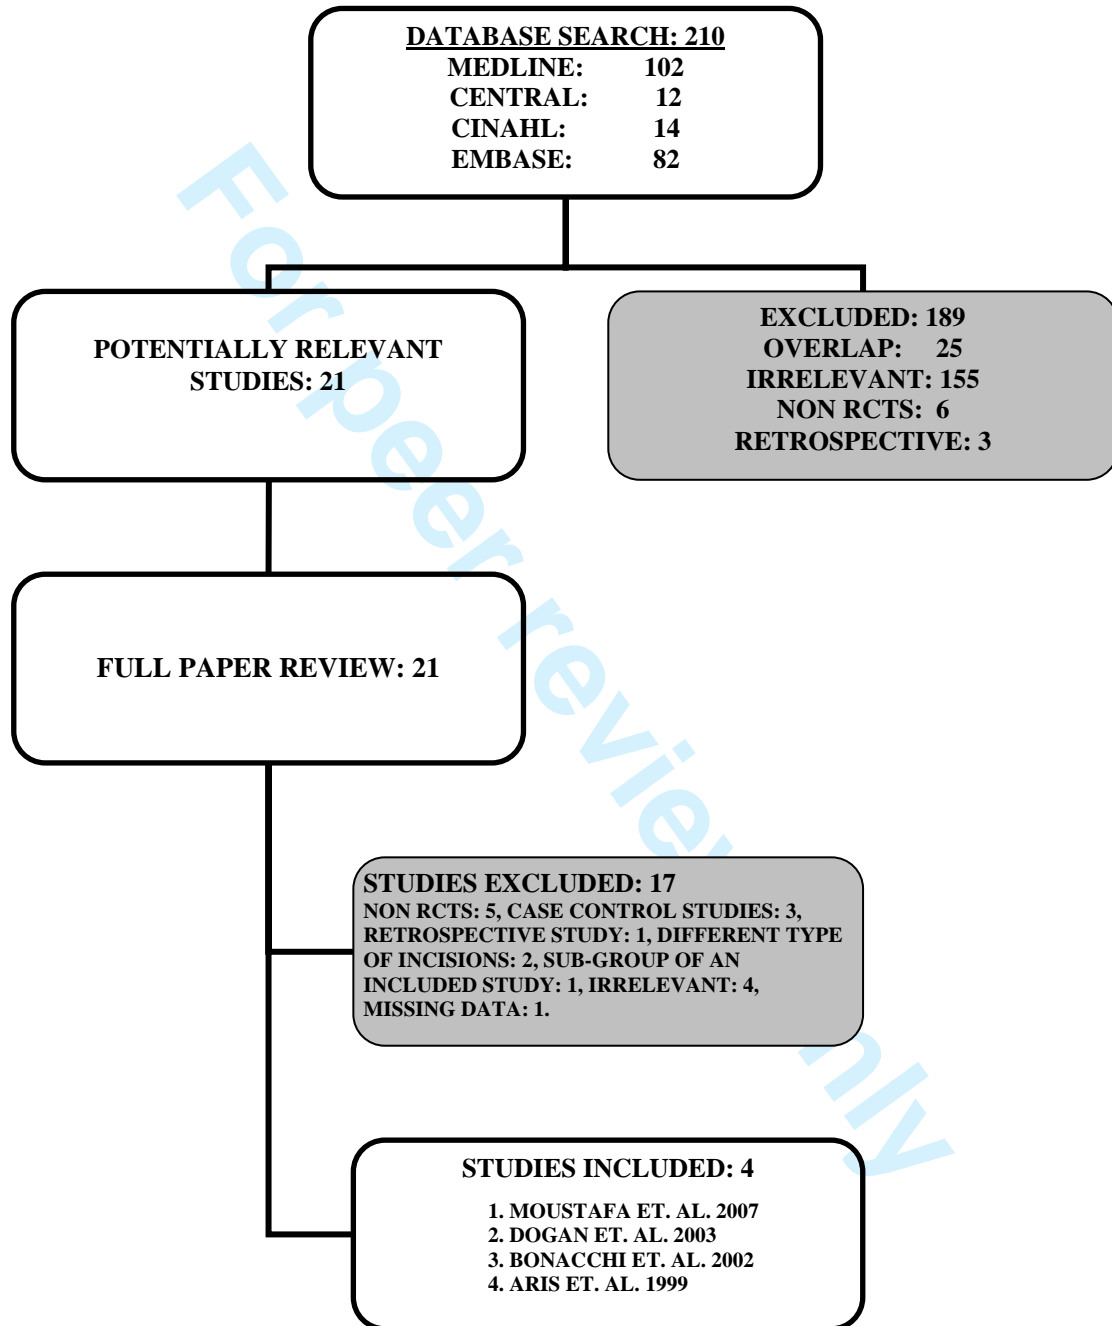

**Table 2 : Study characteristics**

| Study                            | Moustafa et.al.<br>2007                                                                                                                                                                                                     | Dogan et.al.<br>2003                                                                                                                                                                                    | Bonacchi et. al.<br>2002                                                                                                                                                                                                    | Aris et. al.<br>1999                                                                                                                                                                                    |
|----------------------------------|-----------------------------------------------------------------------------------------------------------------------------------------------------------------------------------------------------------------------------|---------------------------------------------------------------------------------------------------------------------------------------------------------------------------------------------------------|-----------------------------------------------------------------------------------------------------------------------------------------------------------------------------------------------------------------------------|---------------------------------------------------------------------------------------------------------------------------------------------------------------------------------------------------------|
| Methods                          | PRCT                                                                                                                                                                                                                        | PRCT                                                                                                                                                                                                    | PRCT                                                                                                                                                                                                                        | PRCT                                                                                                                                                                                                    |
| Number of Participants           | 30 + 30 = 60                                                                                                                                                                                                                | 20 + 20 = 40                                                                                                                                                                                            | 40 + 40 = 80                                                                                                                                                                                                                | 20 + 20 = 40                                                                                                                                                                                            |
| Mean age in years<br>(Full/Mini) | 23.8 / 22.9                                                                                                                                                                                                                 | 64.3 / 65.7                                                                                                                                                                                             | 62.6 / 64.0                                                                                                                                                                                                                 | 62.2 / 66.5                                                                                                                                                                                             |
| Sex M:F (Full/Mini)              | 15:15 / 16:14                                                                                                                                                                                                               | 11:9 / 9:11                                                                                                                                                                                             | -                                                                                                                                                                                                                           | -                                                                                                                                                                                                       |
| Operation                        | Isolated AVR                                                                                                                                                                                                                | Isolated AVR                                                                                                                                                                                            | Isolated AVR                                                                                                                                                                                                                | Isolated AVR                                                                                                                                                                                            |
| Interventions                    | Full sternotomy<br>VS.<br>L shaped Mini-sternotomy<br><br>Pain management with<br>tenoxicam                                                                                                                                 | Complete sternotomy<br>VS.<br>L shaped Mini-sternotomy                                                                                                                                                  | Standard sternotomy<br>VS.<br>C or L shaped Mini-<br>sternotomy                                                                                                                                                             | Median sternotomy<br>VS.<br>C or L shaped Mini-<br>sternotomy<br>Pain management with<br>metamizol                                                                                                      |
| Outcomes                         | Duration of ventilation<br>Post op blood loss<br>Length of ITU stay<br>Pulmonary function<br>Analgesic requirement<br>Length of hospital stay<br>Cross clamp time<br>Bypass time<br>Operation time<br>Survival to discharge | Duration of ventilation<br>Post op blood loss<br>Length of ITU stay<br>Pulmonary function<br>-<br>Length of hospital stay<br>Cross clamp time<br>Bypass time<br>Operation time<br>Survival to discharge | Duration of ventilation<br>Post op blood loss<br>Length of ITU stay<br>Pulmonary function<br>Analgesic requirement<br>Length of hospital stay<br>Cross clamp time<br>Bypass time<br>Operation time<br>Survival to discharge | Duration of ventilation<br>Post op blood loss<br>Length of ITU stay<br>Pulmonary function<br>-<br>Length of Hospital stay<br>Cross clamp time<br>Bypass time<br>Operation time<br>Survival to discharge |

PRCT = Prospective randomized controlled trial, AVR = Aortic valve replacement, VS. = Versus, ITU = Intensive care unit

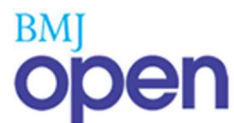

**Mini-sternotomy for Aortic Valve Replacement Reduces the Length of Stay in the Cardiac Intensive Care: Meta-analysis of randomised controlled trials.**

|                                 |                                                                                                                                                                                                 |
|---------------------------------|-------------------------------------------------------------------------------------------------------------------------------------------------------------------------------------------------|
| Journal:                        | <i>BMJ Open</i>                                                                                                                                                                                 |
| Manuscript ID:                  | bmjopen-2011-000266.R2                                                                                                                                                                          |
| Article Type:                   | Research                                                                                                                                                                                        |
| Date Submitted by the Author:   | 22-Oct-2011                                                                                                                                                                                     |
| Complete List of Authors:       | Khoshbin, Espeed; UHSM, Cardiothoracic Surgery<br>Prayaga, Sandhya; GJNH, Anaesthesia<br>Kinsella, John; University of Glasgow, Anaesthesia<br>Sutherland, Fraser; GJNH, Cardiothoracic Surgery |
| <b>Primary Subject Heading</b>: | Cardiovascular medicine                                                                                                                                                                         |
| Secondary Subject Heading:      | Surgery                                                                                                                                                                                         |
| Keywords:                       | Mini-sternotomy , Aortic Valve Replacement , Meta analysis                                                                                                                                      |
|                                 |                                                                                                                                                                                                 |

SCHOLARONE™  
Manuscripts



# Mini-sternotomy for Aortic Valve Replacement Reduces the Length of Stay in the Cardiac Intensive Care: Meta-analysis of randomised controlled trials.

Khoshbin E, Prayaga S, Kinsella J, Sutherland FWH.

Department of Cardiothoracic Surgeon, Golden Jubilee National Hospital, and Academic Unit of Anaesthesia, Pain and Critical Care, University of Glasgow, Scotland, UK.

## Abstract

Background: Mini-sternotomy for isolated aortic valve replacement aims to reduce operative trauma hastening recovery and improving the cosmetic outcome of cardiac surgery. The short-term clinical benefits from the mini-sternotomy are presumed to arise because the incision is less extensive and the lower half of the chest cage remains intact. The basic conduct of virtually all other aspects of the aortic valve replacement procedure remains the same. Therefore, similar long term outcomes are to be expected. Objectives: To conduct a meta-analysis of the only available randomised controlled trials in the published English literature. Data sources: Electronic search for relevant publications in MEDLINE, EMBASE and CENTRAL databases were performed. Four studies met our criteria. Study eligibility criteria: Randomised controlled trials comparing minimally invasive [Inverted 'C' or 'L' (J) shaped] hemi-sternotomy versus conventional sternotomy for adults undergoing isolated aortic valve replacement using standard cardiopulmonary bypass technique. Methods: Our outcome measures were the length of positive pressure ventilation, blood loss, intensive care and hospital stay. Results: The length of ITU stay was significantly shorter by 0.57 days in favour of the mini-sternotomy group (CI: -0.95, -0.2;  $p = 0.003$ ). There was no advantage in terms of duration of ventilation (CI:-3.48, 0.36;  $p = 0.11$ ). However there was some evidence to suggest a reduction in blood loss and the length of stay in hospital in the mini-sternotomy group. This however did not prove to be statistically significant [154.17mls reduction (CI: -324.51, 16.17;  $p = 0.08$ ) and 2.03 days less (CI:-4.12, 0.05;  $p = 0.06$ ) respectively]. Limitations: This study includes a relatively small number of subjects ( $n = 220$ ) and outcome variables. The risk of bias was not assessed during this meta-analysis. Conclusion: Mini-sternotomy for isolated aortic valve replacement significantly reduces the length of stay in cardiac intensive care. Other short term benefits may include a reduction in blood loss or the length of hospital stay.

## Article summary

Article focus: This article tests the null hypothesis that, mini-sternotomy has no outcome benefit for aortic surgery. Key message: Mini-sternotomy for aortic valve replacement reduces the length of stay in intensive care unit. [Sample search strategy: Medline Embase and Central databases.](#) Strengths: Use of highest quality evidence based medicine. Limitations: [This study is not a "Gold Standard" systematic review in the sense of searching grey literature but a confirmatory study.](#)

## Introduction

A mini-sternotomy through an inverted C, L (or J) shaped hemi-sternotomy is a technique that aims to reduce the operative trauma thereby hastening recovery and improving the cosmetic outcome of cardiac surgery. Some may be of the opinion that the latter has the potential to confer the greatest benefit. There have been numerous studies in this subject, some claim benefits in terms of postoperative outcomes, such as ventilation requirement, bleeding, and intensive care and hospital stay for isolated aortic valve replacement performed in this way, others have been equivocal. The two larger meta-analyses in the published literature<sup>(1-2)</sup>, included data from a spectrum of sources ranging from randomised controlled trials (RCT) to non randomised studies. They addressed important broad questions of safety and efficacy<sup>(1)</sup> and mortality and morbidity<sup>(2)</sup> associated with this method. However failed to show any specific advantages in terms of length of positive pressure ventilation, blood loss, intensive care and hospital stay. We believe these outcomes are best assessed by way of RCTs, and hence conducted a meta-analysis to address these specific questions using only the available RCTs<sup>(3-6)</sup> published in this subject.

## Methods

Electronic search for relevant publications in the English language were conducted in MEDLINE, EMBASE and CENTRAL databases starting from 1996, when the first study of minimal invasive AVR was conducted. The eligibility of each study was assessed by more than one author during the search of databases and references. We searched for the keywords 'aortic valve surgery', 'controlled clinical trials' and 'minimally invasive surgery'. Reference lists of relevant articles were also searched. We only included randomised controlled trials in our meta-analysis.

Of the 21 studies found in our search, 4 studies met our criteria. We selected the studies according to the following inclusion criteria: 1. The type of studies: Randomised controlled trials comparing minimally invasive versus conventional sternotomy, 2. Participants: Adult patients undergoing isolated aortic valve replacement using standard cardiopulmonary bypass technique. The exclusion criterions were, 1. Any other type of mini-sternotomy than hemi-sternotomy through inverted 'C' or 'L' (J) shaped approach. 2. The language of the article was limited to English (Table 1).

Our outcome measures included the length of positive pressure ventilation, blood loss, intensive care and hospital stay.

Statistical analysis was performed using Review Manager (RevMan) version 5.0. As the data obtained was continuous, combined mean differences were measured using the Random effects model on the presumption that individual studies had varied outcomes. Tests for heterogeneity were performed using the chi square test, I<sup>2</sup> test and degrees of freedom. In this meta-analysis the risk of bias wasn't assessed.

## Results

There were two meta-analyses in this subject<sup>(1, 2)</sup>, four of five RCTs were subjected to our meta-analysis<sup>(3-6)</sup>. One RCT was excluded due to lack of data<sup>(7)</sup>. An attempt was made to contact the corresponding author for additional information with a view to include that

1  
2  
3 study. This was unsuccessful. Other excluded studies<sup>(8-24)</sup>, were either prospective non-  
4 randomized (n = 5), case control studies (n = 3), retrospective studies (n = 1), different type  
5 of incisions (n = 2) or studies with outcome measures irrelevant to our study (n = 4). The  
6 total number of patients included in this meta-analysis was the sum of the patients recruited  
7 in to the four RCTs. That equals to 220 patients. Table 2 illustrates each of these studies  
8 characteristics. The following results are presented as mean differences in outcomes  
9 between mini-sternotomy and conventional sternotomy groups in the random effects  
10 method.  
11  
12

13  
14 **Duration of mechanical ventilation in hours:** There was a statistically insignificant  
15 reduction in the duration of ventilation (Figure 1). This was 1.56 hours less in the mini-  
16 sternotomy group (CI:-3.48, 0.36;  $p = 0.11$ ).  
17

18  
19 **Postoperative blood loss in the first 24 hours:** There was a statistically insignificant  
20 reduction in blood loss of 154.17mls in the mini-sternotomy group compared to the full  
21 sternotomy (CI: -324.51, 16.17;  $p = 0.08$ ). Illustrated by figure 2.  
22

23  
24 **Lengths of Intensive Care Unit (ICU) stay in days:** Combined mean difference of all the  
25 studies showed that the length of ITU stay was significantly shorter by 0.57 days in favour  
26 of mini-sternotomy group (CI: -0.95, -0.2;  $p = 0.003$ ). Figure 3 illustrates this primary  
27 outcome measure.  
28

29  
30 **Lengths of Hospital stay in days:** As illustrated in figure 4, the duration of hospital stay  
31 was shorter by 2.03 days in favour of the mini-sternotomy group however the difference  
32 again failed to reach statistically significant levels (CI:-4.12, 0.05;  $p = 0.06$ ).  
33  
34

## 35 Discussion

36  
37  
38 We performed a meta-analysis to compare the short term post-operative outcomes in four  
39 published studies, accounted for differences in their findings, and drew a consensus view  
40 on the potential benefits of a mini-sternotomy over a full median sternotomy for a standard  
41 aortic valve replacement. The following outcome measures were assessed: Duration of  
42 ventilation, postoperative blood loss, length of stay in the intensive care unit and the  
43 hospital stay.  
44

45 Using only the best available level of evidence in this meta-analysis we have clearly  
46 illustrated the advantage of the mini-sternotomy approach in reducing the number of days  
47 spent in the intensive care unit ( $p = 0.003$ ) and a lack of advantage in terms of number of  
48 hours ventilated ( $p = 0.11$ ). We failed to prove a clear superiority in favour of mini-  
49 sternotomy in terms of reduction in blood loss ( $p = 0.08$ ) or the length of hospital stay ( $p =$   
50  $0.06$ ). However this shows a trend of significance. None of the previous meta-analyses  
51 showed such a trend. Our meta-analysis therefore highlights a much needed, larger and  
52 adequately powered randomised controlled trial for these specific outcomes. The reduction  
53 in ITU stay by 0.57 days is a more than 50% reduction in the length of stay in ITU for a  
54 typical isolated aortic valve replacement with potential financial advantages.  
55  
56  
57  
58  
59  
60

1  
2  
3 This study is limited as it is not a “Gold Standard” systematic review in the sense of  
4 searching grey literature but a confirmatory study. It only includes four RCTs, with a  
5 relatively small number of subjects and outcome variables. The risk of bias wasn't assessed  
6 during this meta-analysis. A fifth RCT by Macheler et, al. was excluded due to the lack of  
7 data regarding ITU and length of hospital stay, however it should be noted that this trial  
8 supported our findings regarding the duration of ventilation and blood drainage per 24  
9 hours. It should also be mentioned that in the meta-analysis by Morgan et, al.<sup>(1)</sup> three out of  
10 four of the above studies were analyzed separately as a sub group<sup>(4-6)</sup>. They found a non  
11 statistical advantage in terms of ventilation time, bleeding and ITU stay. In contrast this  
12 meta-analysis excludes the RCT by Macheler et, al. but includes the most recent RCT by  
13 Moustafa et, al.<sup>(3)</sup>. Lack of long term data is not exclusive to this meta-analysis.

14  
15  
16 The total number of patients included in this study was 220. This is a small number  
17 considering isolated aortic valve replacement constitutes a large proportion of our cardiac  
18 surgical work. There were two extensive well conducted meta-analysis comparing mini-  
19 sternotomy versus conventional sternotomy for aortic valve replacement<sup>(1, 2)</sup>. They  
20 improved the power of the study by including several comparative non randomised studies,  
21 hence increasing the number of patients to 4,586 and 4,667 respectively. These studies  
22 looked at a wide variety of non-sternotomy incisions. They excluded studies if more than  
23 50% of reported cases were not a mini-sternotomy, or operations other than isolated aortic  
24 valve replacement. Their combined conclusion was that mini-sternotomy can be performed  
25 safely for aortic valve replacement without increased risk of death or major complications  
26<sup>(1)</sup> but with no clinical benefits<sup>(2)</sup>. In contrast the rationale for our study was to focus on  
27 mini-sternotomy incisions and the commonest variations thereof which included the  
28 inverted C and L or (J) mini-sternotomies. In this meta-analysis there are no non mini-  
29 sternotomy cases and all cases underwent isolated aortic valve replacement.

30  
31  
32  
33 There exists a degree of geographical variation which should be taken in to consideration.  
34 For example: the benefits due to the incision. Cosmesis does not appear to be a priority for  
35 patients in the western world<sup>(8)</sup>. A more cosmetic scar may be more of an issue in Asia due  
36 to younger patient population<sup>(3)</sup> (table 2). This was a limitation in this study for which  
37 there was insufficient data for comparisons to be made. However minimally invasive valve  
38 surgery is already known to improve patient satisfaction while reducing costs of cardiac  
39 valve replacement<sup>(25-26)</sup>.

## 40 41 42 **Conclusion**

43  
44  
45 There is a significant reduction in the length of stay in cardiac intensive care unit and an  
46 overall benefit in short term outcomes from mini-sternotomy for isolated aortic valve  
47 replacement. This meta-analysis would no doubt prove useful when designing a much  
48 needed, larger and adequately powered randomised controlled trial in this subject.

## 49 50 51 **Acknowledgement**

52  
53 We would like to thank the department of biostatistics at Robertson Centre, University of  
54 Glasgow for their help with the statistical methods, the library staff at Glasgow Royal  
55 Infirmary and the audit office staff at the Golden Jubilee National Hospital for their help  
56 with the literature search.  
57  
58  
59  
60

## Funding

We would also like to thank Mark Woolley from Cardiosolutions for providing funding to present this work at the International Society of Minimally Invasive Cardiothoracic Surgery in Washington DC, June 2011.

## Competing Interest

None

## Authors' contributions

All authors contributed equally in design, review of the literature analysis and intellectual discussion of this manuscript. All authors critically revised the manuscript and approved the final version. The primary author Dr Espeed Khoshbin presented this work at the International Society of Minimally Invasive Cardiothoracic Surgery in Washington DC, June 2011.

## References

1. Brown ML, McKellar SH, Sundt TM, et al. Ministernotomy versus conventional sternotomy for aortic valve replacement: a systematic review and meta-analysis. *J Thorac Cardiovasc Surg* 2009;137:670-679 e5.
2. Murtuza B, Pepper JR, Stanbridge RD, et al. Minimal access aortic valve replacement: is it worth it? *Ann Thorac Surg* 2008;85:1121-31.
3. Moustafa MA, Abdelsamad AA, Zakaria G, et al. Minimal vs median sternotomy for aortic valve replacement. *Asian Cardiovasc Thorac Ann* 2007;15:472-5.
4. Dogan S, Dzemali O, Wimmer-Greinecker G, et al. Minimally invasive versus conventional aortic valve replacement: a prospective randomized trial. *J Heart Valve Dis* 2003;12:76-80.
5. Bonacchi M, Prifti E, Giunti G, et al. Does ministernotomy improve postoperative outcome in aortic valve operation? A prospective randomized study. *Ann Thorac Surg* 2002;73:460-5; discussion 465-6.
6. Aris A, Camara ML, Montiel J, et al. Ministernotomy versus median sternotomy for aortic valve replacement: a prospective, randomized study. *Ann Thorac Surg* 1999;67:1583-7; discussion 1587-8.
7. Machler HE, Bergmann P, Anelli-Monti M, et al. Minimally invasive versus conventional aortic valve operations: a prospective study in 120 patients. *Ann Thorac Surg* 1999;67:1001-5.
8. Ehrlich W, Skwara W, Klovekorn W, et al. Do patients want minimally invasive aortic valve replacement? *Eur J Cardiothorac Surg* 2000;17:714-7.
9. Bakir I, Casselman FP, Wellens F, et al. Minimally invasive versus standard approach aortic valve replacement: a study in 506 patients. *Ann Thorac Surg* 2006;81:1599-604.
10. Chang YS, Lin PJ, Chang CH, et al. "I" ministernotomy for aortic valve replacement. *Ann Thorac Surg* 1999;68:40-5.
11. Byrne JG, Aranki SF, Couper GS, et al. Reoperative aortic valve replacement: partial upper hemisternotomy versus conventional full sternotomy. *J Thorac Cardiovasc Surg* 1999;118:991-7.
12. Candaele S, Herijgers P, Demeyere R, et al. Chest pain after partial upper versus complete sternotomy for aortic valve surgery. *Acta Cardiol* 2003;58:17-21.
13. Christiansen S, Stypmann J, Tjan TD, et al. Minimally-invasive versus conventional aortic valve replacement--perioperative course and mid-term results. *Eur J Cardiothorac Surg* 1999;16:647-52.
14. De Smet JM, Rondelet B, Jansens JL, et al. Assessment based on EuroSCORE of ministernotomy for aortic valve replacement. *Asian Cardiovasc Thorac Ann* 2004;12:53-7.
15. Corbi P, Rahmati M, Donal E, et al. Prospective comparison of minimally invasive and standard techniques for aortic valve replacement: initial experience in the first hundred patients. *J Card Surg* 2003;18:133-9.
16. Detter C, Deuse T, Boehm DH, et al. Midterm results and quality of life after minimally invasive vs. conventional aortic valve replacement. *Thorac Cardiovasc Surg* 2002;50:337-41.



17. Doll N, Borger MA, Hain J, et al. Minimal access aortic valve replacement: effects on morbidity and resource utilization. *Ann Thorac Surg* 2002;74:S1318-22.
18. Farhat F, Lu Z, Lefevre M, et al. Prospective comparison between total sternotomy and ministernotomy for aortic valve replacement. *J Card Surg* 2003;18:396-401; discussion 402-3.
19. Imazeki T, Irie Y. [Aortic valve replacement through a partial sternotomy]. *Kyobu Geka* 2006;59:650-5.
20. Lee JW, Lee SK, Choo SJ, et al. Routine minimally invasive aortic valve procedures. *Cardiovasc Surg* 2000;8:484-90.
21. Leshnower BG, Trace CS, Boova RS. Port-access-assisted aortic valve replacement: a comparison of minimally invasive and conventional techniques. *Heart Surg Forum* 2006;9:E560-4; discussion E564.
22. Liu J, Sidiropoulos A, Konertz W. Minimally invasive aortic valve replacement (AVR) compared to standard AVR. *Eur J Cardiothorac Surg* 1999;16 Suppl 2:S80-3.
23. Masiello P, Coscioni E, Panza A, et al. Surgical results of aortic valve replacement via partial upper sternotomy: comparison with median sternotomy. *Cardiovasc Surg* 2002;10:333-8.
24. Mihaljevic T, Cohn LH, Unic D, et al. One thousand minimally invasive valve operations: early and late results. *Ann Surg* 2004;240:529-34; discussion 534.
25. Cohn LH, Adams DH, Couper GS, et al. Minimally invasive cardiac valve surgery improves patient satisfaction whole reducing costs of cardiac valve replacement and repair. *Ann Surg* 1997;226:421-428.
26. Cosgrove DM, Sabik JF. Minimally invasive approach for aortic valve operations. *Ann Thorac Surg* 1996;62:596-597.

Table 1: PRISMA flow diagram

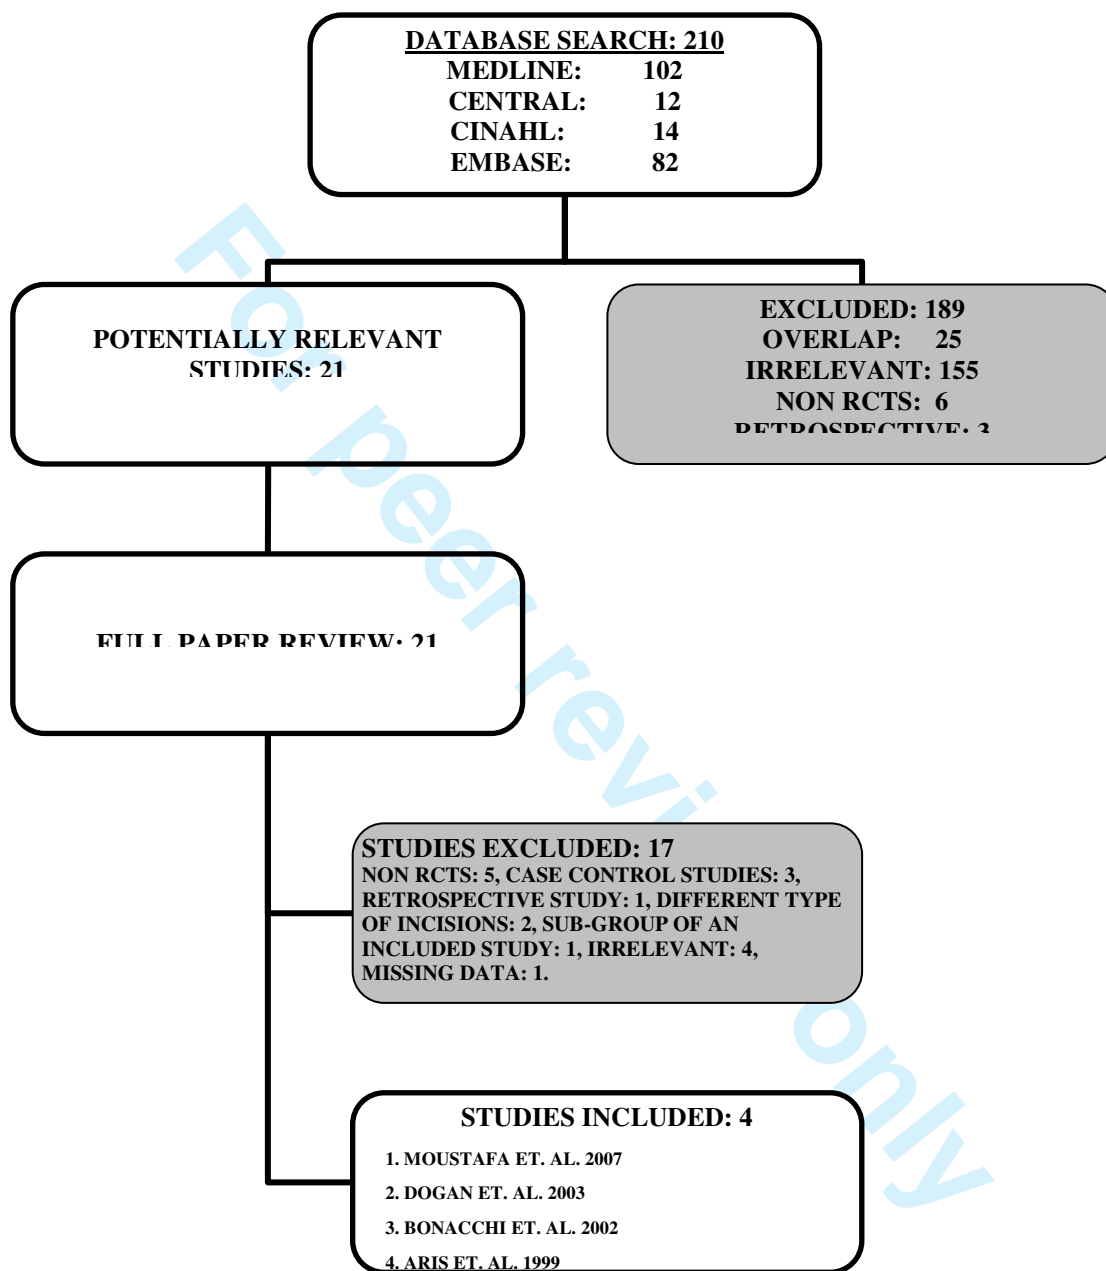



**Table 2 : Study characteristics**

| Study                            | Moustafa et.al.<br>2007                                                                                                                                                                                                     | Dogan et.al.<br>2003                                                                                                                                                                                    | Bonacchi et. al.<br>2002                                                                                                                                                                                                    | Aris et. al.<br>1999                                                                                                                                                                                    |
|----------------------------------|-----------------------------------------------------------------------------------------------------------------------------------------------------------------------------------------------------------------------------|---------------------------------------------------------------------------------------------------------------------------------------------------------------------------------------------------------|-----------------------------------------------------------------------------------------------------------------------------------------------------------------------------------------------------------------------------|---------------------------------------------------------------------------------------------------------------------------------------------------------------------------------------------------------|
| Methods                          | PRCT                                                                                                                                                                                                                        | PRCT                                                                                                                                                                                                    | PRCT                                                                                                                                                                                                                        | PRCT                                                                                                                                                                                                    |
| Number of Participants           | 30 + 30 = 60                                                                                                                                                                                                                | 20 + 20 = 40                                                                                                                                                                                            | 40 + 40 = 80                                                                                                                                                                                                                | 20 + 20 = 40                                                                                                                                                                                            |
| Mean age in years<br>(Full/Mini) | 23.8 / 22.9                                                                                                                                                                                                                 | 64.3 / 65.7                                                                                                                                                                                             | 62.6 / 64.0                                                                                                                                                                                                                 | 62.2 / 66.5                                                                                                                                                                                             |
| Sex M:F (Full/Mini)              | 15:15 / 16:14                                                                                                                                                                                                               | 11:9 / 9:11                                                                                                                                                                                             | -                                                                                                                                                                                                                           | -                                                                                                                                                                                                       |
| Operation                        | Isolated AVR                                                                                                                                                                                                                | Isolated AVR                                                                                                                                                                                            | Isolated AVR                                                                                                                                                                                                                | Isolated AVR                                                                                                                                                                                            |
| Interventions                    | Full sternotomy<br>VS.<br>L shaped Mini-sternotomy<br><br>Pain management with<br>tenoxicam                                                                                                                                 | Complete sternotomy<br>VS.<br>L shaped Mini-sternotomy                                                                                                                                                  | Standard sternotomy<br>VS.<br>C or L shaped Mini-sternotomy                                                                                                                                                                 | Median sternotomy<br>VS.<br>C or L shaped Mini-sternotomy<br>Pain management with<br>metamizol                                                                                                          |
| Outcomes                         | Duration of ventilation<br>Post op blood loss<br>Length of ITU stay<br>Pulmonary function<br>Analgesic requirement<br>Length of hospital stay<br>Cross clamp time<br>Bypass time<br>Operation time<br>Survival to discharge | Duration of ventilation<br>Post op blood loss<br>Length of ITU stay<br>Pulmonary function<br>-<br>Length of hospital stay<br>Cross clamp time<br>Bypass time<br>Operation time<br>Survival to discharge | Duration of ventilation<br>Post op blood loss<br>Length of ITU stay<br>Pulmonary function<br>Analgesic requirement<br>Length of hospital stay<br>Cross clamp time<br>Bypass time<br>Operation time<br>Survival to discharge | Duration of ventilation<br>Post op blood loss<br>Length of ITU stay<br>Pulmonary function<br>-<br>Length of Hospital stay<br>Cross clamp time<br>Bypass time<br>Operation time<br>Survival to discharge |

PRCT = Prospective randomized controlled trial, AVR = Aortic valve replacement, VS. = Versus, ITU = Intensive care unit

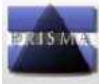

# PRISMA 2009 Checklist

| Section/topic                      | #  | Mini-sternotomy for Aortic Valve Replacement Reduces the Length of Stay in the Cardiac Intensive Care: Meta-analysis of randomised controlled trials. Khoshbin E, Prayaga S, Kinsella J, Sutherland FWH.                                                                                                    | Reported on page # |
|------------------------------------|----|-------------------------------------------------------------------------------------------------------------------------------------------------------------------------------------------------------------------------------------------------------------------------------------------------------------|--------------------|
| <b>TITLE</b>                       |    |                                                                                                                                                                                                                                                                                                             |                    |
| Title                              | 1  | Identify the report as a systematic review, meta-analysis, or both.                                                                                                                                                                                                                                         | 1                  |
| <b>ABSTRACT</b>                    |    |                                                                                                                                                                                                                                                                                                             |                    |
| Structured summary                 | 2  | Provide a structured summary including, as applicable: background; objectives; data sources; study eligibility criteria, participants, and interventions; study appraisal and synthesis methods; results; limitations; conclusions and implications of key findings; systematic review registration number. | 1                  |
| <b>INTRODUCTION</b>                |    |                                                                                                                                                                                                                                                                                                             |                    |
| Rationale                          | 3  | Describe the rationale for the review in the context of what is already known.                                                                                                                                                                                                                              | 1                  |
| Objectives                         | 4  | Provide an explicit statement of questions being addressed with reference to participants, interventions, comparisons, outcomes, and study design (PICOS).                                                                                                                                                  | 1&2                |
| <b>METHODS</b>                     |    |                                                                                                                                                                                                                                                                                                             |                    |
| Protocol and registration          | 5  | Indicate if a review protocol exists, if and where it can be accessed (e.g., Web address), and, if available, provide registration information including registration number.                                                                                                                               | -                  |
| Eligibility criteria               | 6  | Specify study characteristics (e.g., PICOS, length of follow-up) and report characteristics (e.g., years considered, language, publication status) used as criteria for eligibility, giving rationale.                                                                                                      | 2                  |
| Information sources                | 7  | Describe all information sources (e.g., databases with dates of coverage, contact with study authors to identify additional studies) in the search and date last searched.                                                                                                                                  | 2                  |
| Search                             | 8  | Present full electronic search strategy for at least one database, including any limits used, such that it could be repeated.                                                                                                                                                                               | 2                  |
| Study selection                    | 9  | State the process for selecting studies (i.e., screening, eligibility, included in systematic review, and, if applicable, included in the meta-analysis).                                                                                                                                                   | 2                  |
| Data collection process            | 10 | Describe method of data extraction from reports (e.g., piloted forms, independently, in duplicate) and any processes for obtaining and confirming data from investigators.                                                                                                                                  | 2                  |
| Data items                         | 11 | List and define all variables for which data were sought (e.g., PICOS, funding sources) and any assumptions and simplifications made.                                                                                                                                                                       | 2                  |
| Risk of bias in individual studies | 12 | Describe methods used for assessing risk of bias of individual studies (including specification of whether this was done at the study or outcome level), and how this information is to be used in any data synthesis.                                                                                      | -                  |
| Summary measures                   | 13 | State the principal summary measures (e.g., risk ratio, difference in means).                                                                                                                                                                                                                               | 2                  |

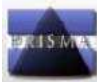

# PRISMA 2009 Checklist

|   |   |                      |                                                                                                                                                              |   |
|---|---|----------------------|--------------------------------------------------------------------------------------------------------------------------------------------------------------|---|
| 3 | 4 | Synthesis of results | 14 Describe the methods of handling data and combining results of studies, if done, including measures of consistency (e.g., $I^2$ ) for each meta-analysis. | 2 |
|---|---|----------------------|--------------------------------------------------------------------------------------------------------------------------------------------------------------|---|

Page 1 of 2

|   |   |                      |          |                                                                                                                                                                                        |                           |
|---|---|----------------------|----------|----------------------------------------------------------------------------------------------------------------------------------------------------------------------------------------|---------------------------|
| 7 | 8 | <b>Section/topic</b> | <b>#</b> | <b>Mini-sternotomy for Aortic Valve Replacement Reduces the Length of Stay in the Cardiac Intensive Care: A Mini Meta-analysis.</b> Khoshbin E, Prayaga S, Kinsella J, Sutherland FWH. | <b>Reported on page #</b> |
|---|---|----------------------|----------|----------------------------------------------------------------------------------------------------------------------------------------------------------------------------------------|---------------------------|

|    |    |                             |                                                                                                                                                 |   |
|----|----|-----------------------------|-------------------------------------------------------------------------------------------------------------------------------------------------|---|
| 10 | 11 | Risk of bias across studies | 15 Specify any assessment of risk of bias that may affect the cumulative evidence (e.g., publication bias, selective reporting within studies). | - |
|----|----|-----------------------------|-------------------------------------------------------------------------------------------------------------------------------------------------|---|

|    |    |                     |                                                                                                                                                     |   |
|----|----|---------------------|-----------------------------------------------------------------------------------------------------------------------------------------------------|---|
| 13 | 14 | Additional analyses | 16 Describe methods of additional analyses (e.g., sensitivity or subgroup analyses, meta-regression), if done, indicating which were pre-specified. | 2 |
|----|----|---------------------|-----------------------------------------------------------------------------------------------------------------------------------------------------|---|

|    |                |  |  |  |
|----|----------------|--|--|--|
| 15 | <b>RESULTS</b> |  |  |  |
|----|----------------|--|--|--|

|    |    |                 |                                                                                                                                                                    |            |
|----|----|-----------------|--------------------------------------------------------------------------------------------------------------------------------------------------------------------|------------|
| 17 | 18 | Study selection | 17 Give numbers of studies screened, assessed for eligibility, and included in the review, with reasons for exclusions at each stage, ideally with a flow diagram. | 2-3&Table1 |
|----|----|-----------------|--------------------------------------------------------------------------------------------------------------------------------------------------------------------|------------|

|    |    |                       |                                                                                                                                                 |          |
|----|----|-----------------------|-------------------------------------------------------------------------------------------------------------------------------------------------|----------|
| 19 | 20 | Study characteristics | 18 For each study, present characteristics for which data were extracted (e.g., study size, PICOS, follow-up period) and provide the citations. | 2&Table2 |
|----|----|-----------------------|-------------------------------------------------------------------------------------------------------------------------------------------------|----------|

|    |    |                             |                                                                                                              |            |
|----|----|-----------------------------|--------------------------------------------------------------------------------------------------------------|------------|
| 22 | 23 | Risk of bias within studies | 19 Present data on risk of bias of each study and, if available, any outcome level assessment (see item 12). | Figures1-4 |
|----|----|-----------------------------|--------------------------------------------------------------------------------------------------------------|------------|

|    |    |                               |                                                                                                                                                                                                             |            |
|----|----|-------------------------------|-------------------------------------------------------------------------------------------------------------------------------------------------------------------------------------------------------------|------------|
| 23 | 24 | Results of individual studies | 20 For all outcomes considered (benefits or harms), present, for each study: (a) simple summary data for each intervention group (b) effect estimates and confidence intervals, ideally with a forest plot. | Figures1-4 |
|----|----|-------------------------------|-------------------------------------------------------------------------------------------------------------------------------------------------------------------------------------------------------------|------------|

|    |    |                      |                                                                                                            |            |
|----|----|----------------------|------------------------------------------------------------------------------------------------------------|------------|
| 26 | 27 | Synthesis of results | 21 Present results of each meta-analysis done, including confidence intervals and measures of consistency. | Figures1-4 |
|----|----|----------------------|------------------------------------------------------------------------------------------------------------|------------|

|    |    |                             |                                                                                    |   |
|----|----|-----------------------------|------------------------------------------------------------------------------------|---|
| 27 | 28 | Risk of bias across studies | 22 Present results of any assessment of risk of bias across studies (see Item 15). | - |
|----|----|-----------------------------|------------------------------------------------------------------------------------|---|

|    |    |                     |                                                                                                                          |            |
|----|----|---------------------|--------------------------------------------------------------------------------------------------------------------------|------------|
| 29 | 30 | Additional analysis | 23 Give results of additional analyses, if done (e.g., sensitivity or subgroup analyses, meta-regression [see Item 16]). | Figures1-4 |
|----|----|---------------------|--------------------------------------------------------------------------------------------------------------------------|------------|

|    |                   |  |  |  |
|----|-------------------|--|--|--|
| 31 | <b>DISCUSSION</b> |  |  |  |
|----|-------------------|--|--|--|

|    |    |                     |                                                                                                                                                                                         |   |
|----|----|---------------------|-----------------------------------------------------------------------------------------------------------------------------------------------------------------------------------------|---|
| 32 | 33 | Summary of evidence | 24 Summarize the main findings including the strength of evidence for each main outcome; consider their relevance to key groups (e.g., healthcare providers, users, and policy makers). | 3 |
|----|----|---------------------|-----------------------------------------------------------------------------------------------------------------------------------------------------------------------------------------|---|

|    |    |             |                                                                                                                                                                  |   |
|----|----|-------------|------------------------------------------------------------------------------------------------------------------------------------------------------------------|---|
| 34 | 35 | Limitations | 25 Discuss limitations at study and outcome level (e.g., risk of bias), and at review-level (e.g., incomplete retrieval of identified research, reporting bias). | 4 |
|----|----|-------------|------------------------------------------------------------------------------------------------------------------------------------------------------------------|---|

|    |    |             |                                                                                                                            |   |
|----|----|-------------|----------------------------------------------------------------------------------------------------------------------------|---|
| 37 | 38 | Conclusions | 26 Provide a general interpretation of the results in the context of other evidence, and implications for future research. | 4 |
|----|----|-------------|----------------------------------------------------------------------------------------------------------------------------|---|

|    |                |  |  |  |
|----|----------------|--|--|--|
| 39 | <b>FUNDING</b> |  |  |  |
|----|----------------|--|--|--|

|    |    |         |                                                                                                                                               |   |
|----|----|---------|-----------------------------------------------------------------------------------------------------------------------------------------------|---|
| 40 | 41 | Funding | 27 Describe sources of funding for the systematic review and other support (e.g., supply of data); role of funders for the systematic review. | 5 |
|----|----|---------|-----------------------------------------------------------------------------------------------------------------------------------------------|---|

From: Moher D, Liberati A, Tetzlaff J, Altman DG, The PRISMA Group (2009). Preferred Reporting Items for Systematic Reviews and Meta-Analyses: The PRISMA Statement. PLoS Med 6(6): e1000097.

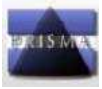

# PRISMA 2009 Checklist

doi:10.1371/journal.pmed1000097

For more information, visit: [www.prisma-statement.org](http://www.prisma-statement.org).

Page 2 of 2

For peer review only

1  
2  
3  
4  
5  
6  
7  
8  
9  
10  
11  
12  
13  
14  
15  
16  
17  
18  
19  
20  
21  
22  
23  
24  
25  
26  
27  
28  
29  
30  
31  
32  
33  
34  
35  
36  
37  
38  
39  
40  
41  
42  
43  
44  
45  
46  
47  
48  
49

Table 1: PRISMA flow diagram

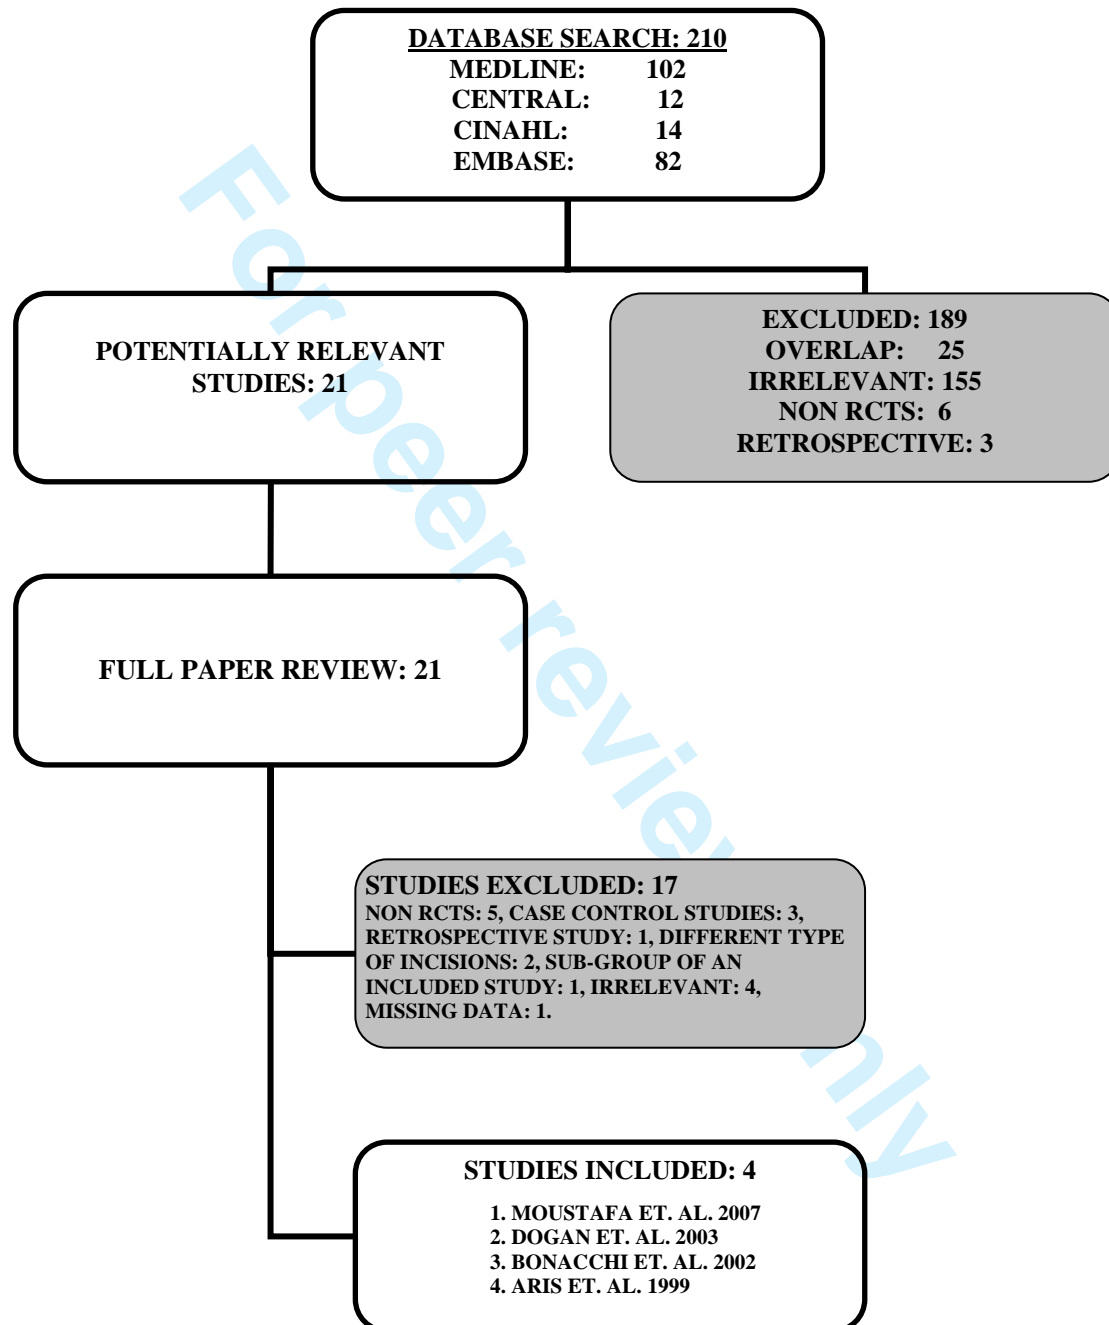

**Table 2 : Study characteristics**

| Study                            | Moustafa et.al.<br>2007                                                                                                                                                                                                     | Dogan et.al.<br>2003                                                                                                                                                                                    | Bonacchi et. al.<br>2002                                                                                                                                                                                                    | Aris et. al.<br>1999                                                                                                                                                                                    |
|----------------------------------|-----------------------------------------------------------------------------------------------------------------------------------------------------------------------------------------------------------------------------|---------------------------------------------------------------------------------------------------------------------------------------------------------------------------------------------------------|-----------------------------------------------------------------------------------------------------------------------------------------------------------------------------------------------------------------------------|---------------------------------------------------------------------------------------------------------------------------------------------------------------------------------------------------------|
| Methods                          | PRCT                                                                                                                                                                                                                        | PRCT                                                                                                                                                                                                    | PRCT                                                                                                                                                                                                                        | PRCT                                                                                                                                                                                                    |
| Number of Participants           | 30 + 30 = 60                                                                                                                                                                                                                | 20 + 20 = 40                                                                                                                                                                                            | 40 + 40 = 80                                                                                                                                                                                                                | 20 + 20 = 40                                                                                                                                                                                            |
| Mean age in years<br>(Full/Mini) | 23.8 / 22.9                                                                                                                                                                                                                 | 64.3 / 65.7                                                                                                                                                                                             | 62.6 / 64.0                                                                                                                                                                                                                 | 62.2 / 66.5                                                                                                                                                                                             |
| Sex M:F (Full/Mini)              | 15:15 / 16:14                                                                                                                                                                                                               | 11:9 / 9:11                                                                                                                                                                                             | -                                                                                                                                                                                                                           | -                                                                                                                                                                                                       |
| Operation                        | Isolated AVR                                                                                                                                                                                                                | Isolated AVR                                                                                                                                                                                            | Isolated AVR                                                                                                                                                                                                                | Isolated AVR                                                                                                                                                                                            |
| Interventions                    | Full sternotomy<br>VS.<br>L shaped Mini-sternotomy<br><br>Pain management with<br>tenoxicam                                                                                                                                 | Complete sternotomy<br>VS.<br>L shaped Mini-sternotomy                                                                                                                                                  | Standard sternotomy<br>VS.<br>C or L shaped Mini-<br>sternotomy                                                                                                                                                             | Median sternotomy<br>VS.<br>C or L shaped Mini-<br>sternotomy<br>Pain management with<br>metamizol                                                                                                      |
| Outcomes                         | Duration of ventilation<br>Post op blood loss<br>Length of ITU stay<br>Pulmonary function<br>Analgesic requirement<br>Length of hospital stay<br>Cross clamp time<br>Bypass time<br>Operation time<br>Survival to discharge | Duration of ventilation<br>Post op blood loss<br>Length of ITU stay<br>Pulmonary function<br>-<br>Length of hospital stay<br>Cross clamp time<br>Bypass time<br>Operation time<br>Survival to discharge | Duration of ventilation<br>Post op blood loss<br>Length of ITU stay<br>Pulmonary function<br>Analgesic requirement<br>Length of hospital stay<br>Cross clamp time<br>Bypass time<br>Operation time<br>Survival to discharge | Duration of ventilation<br>Post op blood loss<br>Length of ITU stay<br>Pulmonary function<br>-<br>Length of Hospital stay<br>Cross clamp time<br>Bypass time<br>Operation time<br>Survival to discharge |

PRCT = Prospective randomized controlled trial, AVR = Aortic valve replacement, VS. = Versus, ITU = Intensive care unit

Peer review only

**Figure 1: Duration of ventilation in hours.**

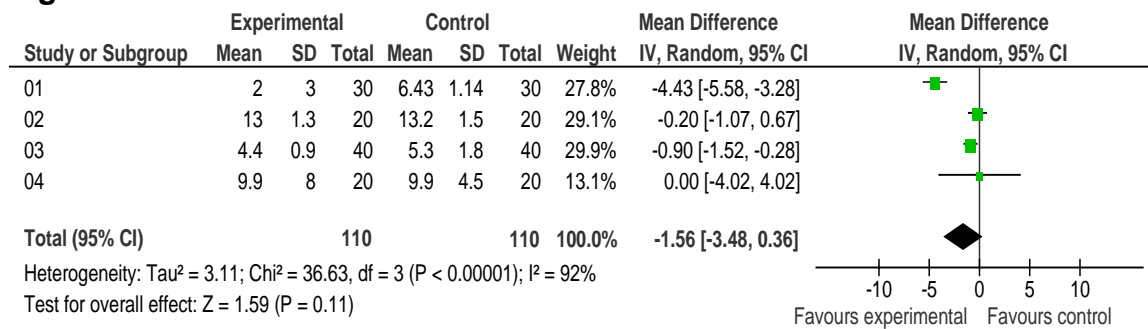

For peer review only

1  
2  
3  
4  
5  
6  
7  
8  
9  
10  
11  
12  
13  
14  
15  
16  
17  
18  
19  
20  
21  
22  
23  
24  
25  
26  
27  
28  
29  
30  
31  
32  
33  
34  
35  
36  
37  
38  
39  
40  
41  
42  
43  
44  
45  
46  
47  
48  
49  
50  
51  
52  
53  
54  
55  
56  
57  
58  
59  
60

**Figure 2: Post operative bleeding in the first 24 hours measured in milliliters.**

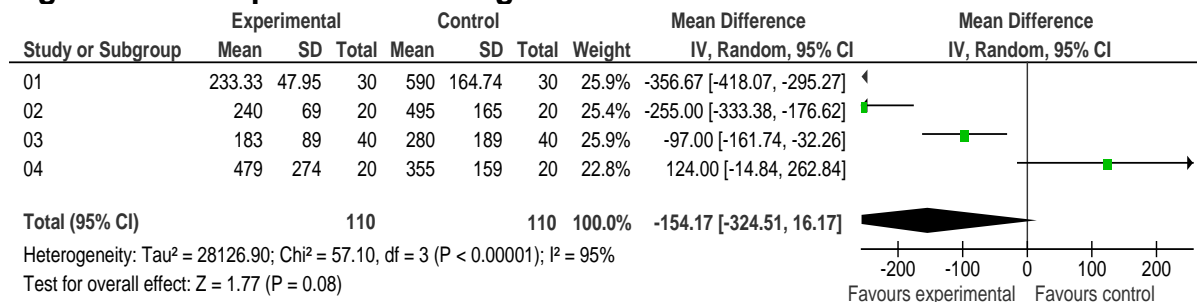

For peer review only

1  
2  
3  
4  
5  
6  
7  
8  
9  
10  
11  
12  
13  
14  
15  
16  
17  
18  
19  
20  
21  
22  
23  
24  
25  
26  
27  
28  
29  
30  
31  
32  
33  
34  
35  
36  
37  
38  
39  
40  
41  
42  
43  
44  
45  
46  
47  
48  
49  
50  
51  
52  
53  
54  
55  
56  
57  
58  
59  
60



**Figure 3: Length of ITU stay in days.**

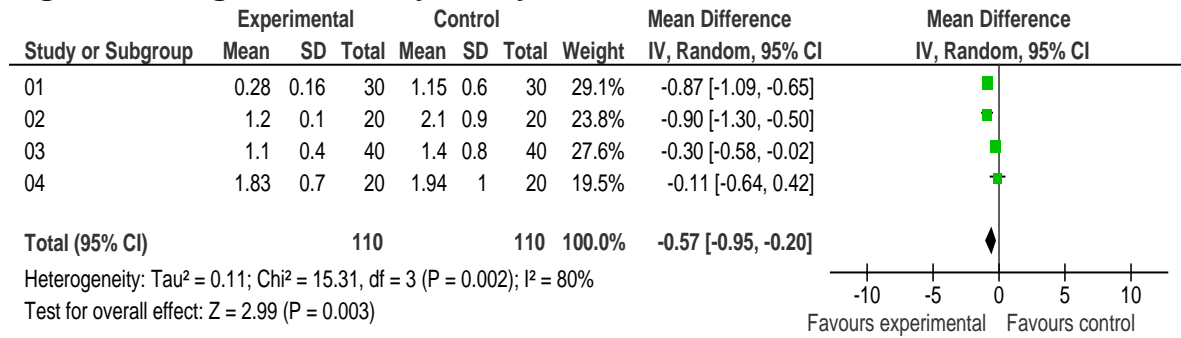

For peer review only

1  
2  
3  
4  
5  
6  
7  
8  
9  
10  
11  
12  
13  
14  
15  
16  
17  
18  
19  
20  
21  
22  
23  
24  
25  
26  
27  
28  
29  
30  
31  
32  
33  
34  
35  
36  
37  
38  
39  
40  
41  
42  
43  
44  
45  
46  
47  
48  
49  
50  
51  
52  
53  
54  
55  
56  
57  
58  
59  
60

Figure 4: Length of hospital stay in days.

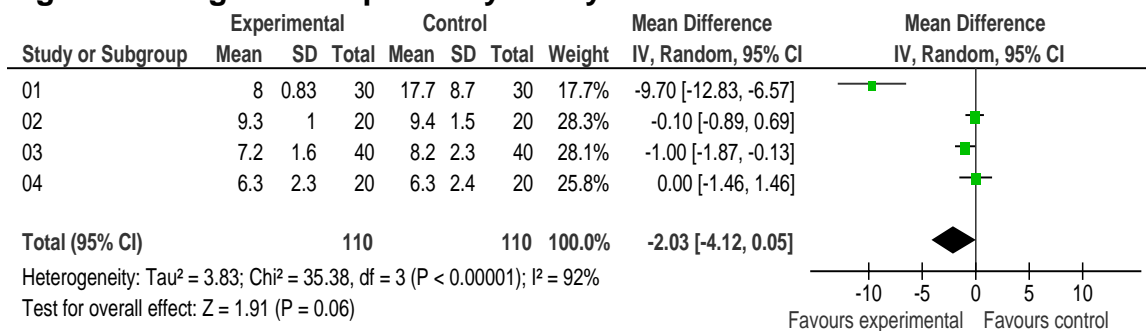

For peer review only

1  
2  
3  
4  
5  
6  
7  
8  
9  
10  
11  
12  
13  
14  
15  
16  
17  
18  
19  
20  
21  
22  
23  
24  
25  
26  
27  
28  
29  
30  
31  
32  
33  
34  
35  
36  
37  
38  
39  
40  
41  
42  
43  
44  
45  
46  
47  
48  
49  
50  
51  
52  
53  
54  
55  
56  
57  
58  
59  
60
